# Supplementary material for: Effects of Electroporation on the Function of Sarco/Endoplasmic Reticulum Ca2+-ATPase and Na+,K+-ATPase in H9c2 Cells
Source: MDPI journal article supplement (doi:10.3390/app14072695), 2024-03-22
Supplement: s1 [file s1]

## **Supplementary materials S1-S2**

### **Effects of electroporation on the function of sarco/endoplasmic reticulum $\text{Ca}^{2+}$ -ATPase and $\text{Na}^{+},\text{K}^{+}$ -ATPase in H9c2 cells**

**Vid Jan, Maida Jusović, Damijan Miklavčič\***

Faculty of Electrical Engineering, University of Ljubljana, SI-1000  
Ljubljana, Slovenia

\*Correspondence: [damijan.miklavcic@fe.uni-lj.si](mailto:damijan.miklavcic@fe.uni-lj.si)

## **Supplementary figure S1**

## Supplementary figure S1

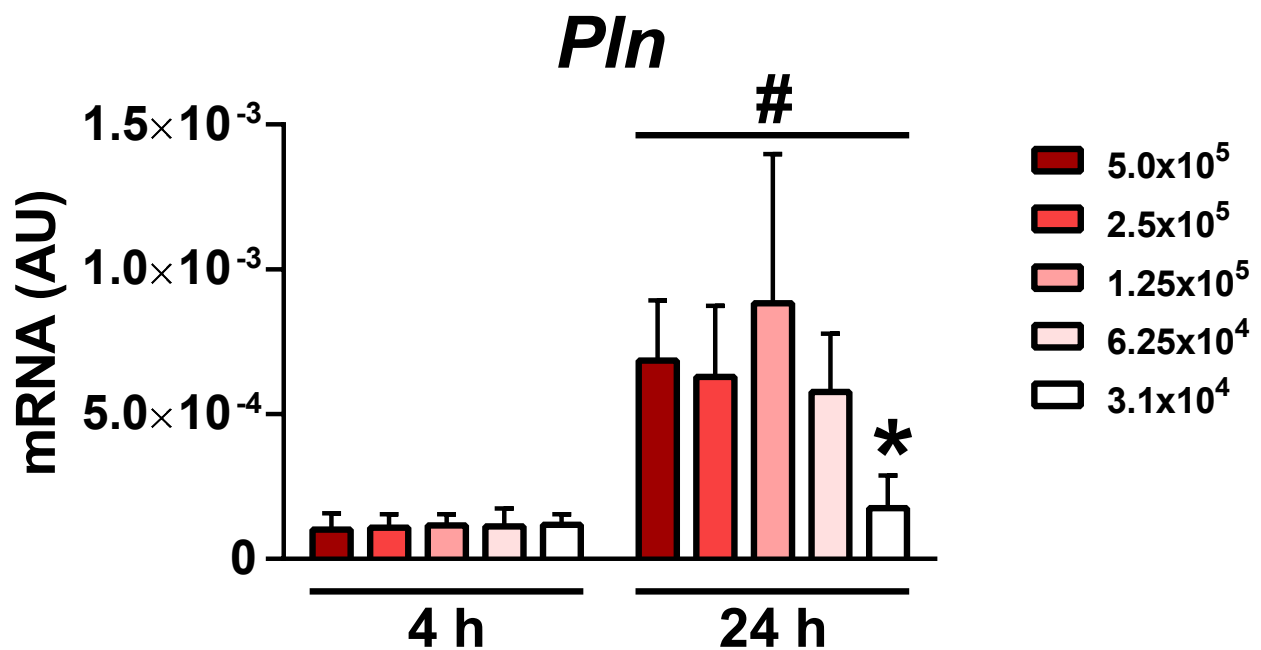

**Supplementary figure S1:** Cell seeding concentration affects the expression of phospholamban (Pln). H9c2 cells were seeded at 5 different concentrations (from  $5.0 \times 10^5$  to  $3.125 \times 10^4$ ) and then incubated for either 4 or 24 hours. qPCR was used to determine gene expression of phospholamban (Pln). Values on the graph are means  $\pm$  SD (n=3) and results that are statistically significant are indicated (\*  $P < 0.05$  vs. Basal; #  $P < 0.05$  4 h vs. 24 h. Two-way ANOVA with Dunnet's post-hoc adjustment was used for statistical evaluation).

## **Supplement S2: Raw immunoblots**

Immunoreactive bands were visualized using enhanced chemiluminescence using Alliance Q9 (Uvitec, UK) and Quantity One 1-D Analysis Software 4.6.8. (Bio-Rad, U.S.)

Loading and transfer were evaluated by Ponceau S (0.1% (w/v) in 5% (v/v) acetic acid) staining.

## Monopolar pulses

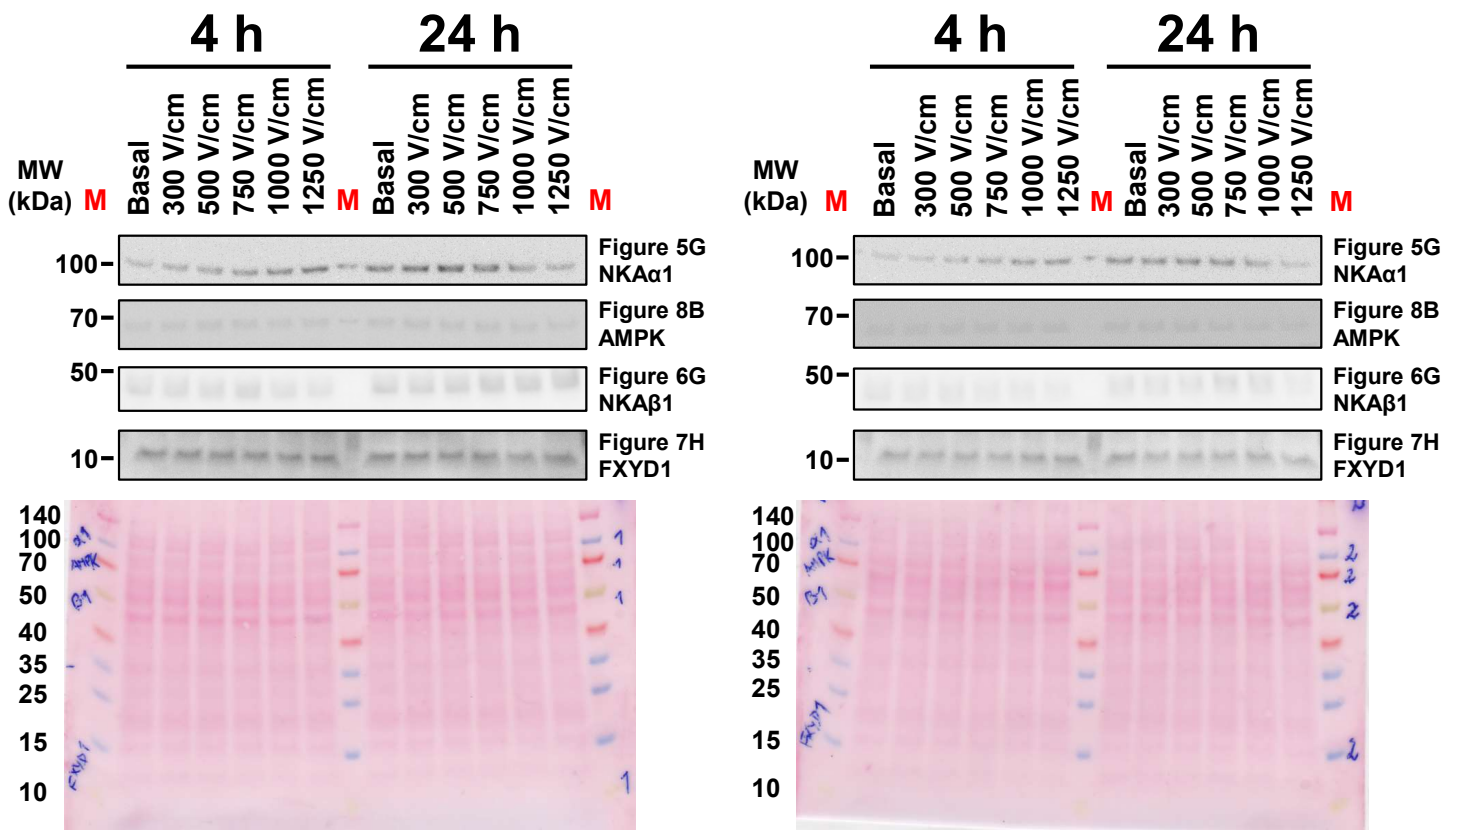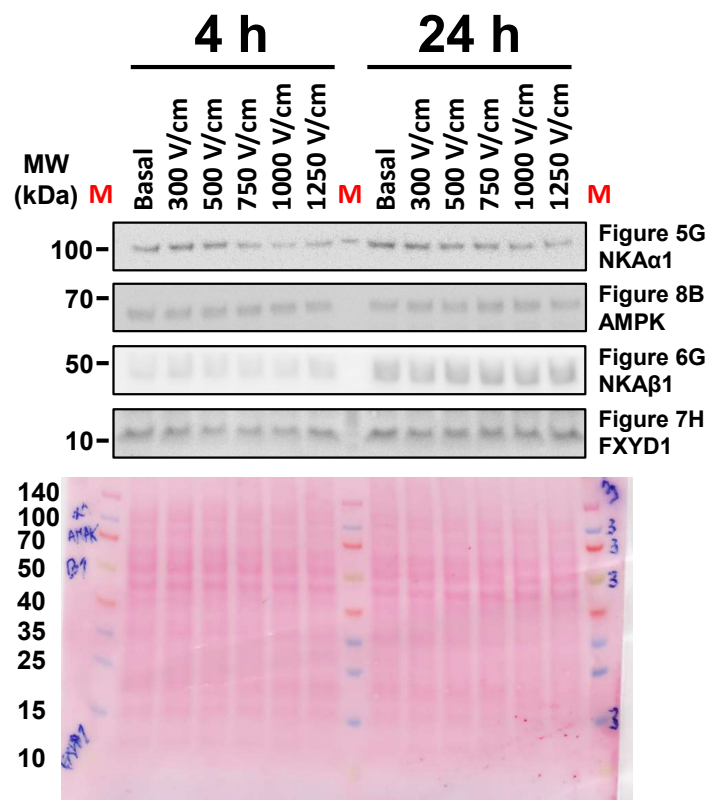

Red framed blots were excluded from statistical analyses either due to low intensity or no visible bands. Detections that were performed on stripped membranes are labelled with asterisks and green text

Immunoreactive bands were visualized using enhanced chemiluminescence using Alliance Q9 (Uvitec, UK) and Quantity One 1-D Analysis Software 4.6.8. (Bio-Rad, U.S.)

Loading and transfer were evaluated by Ponceau S (0.1% (w/v) in 5% (v/v) acetic acid) staining.

## Monopolar pulses

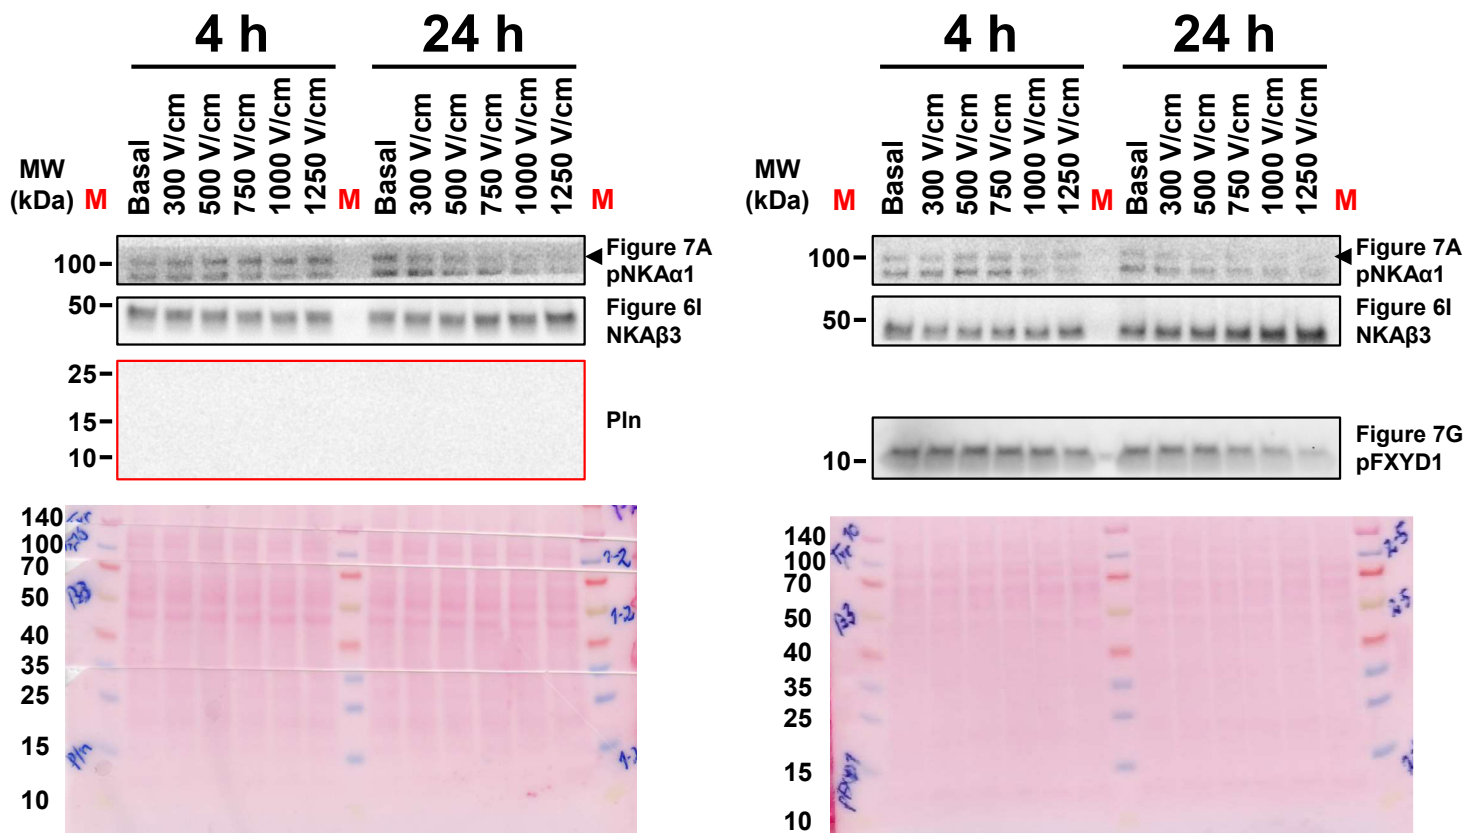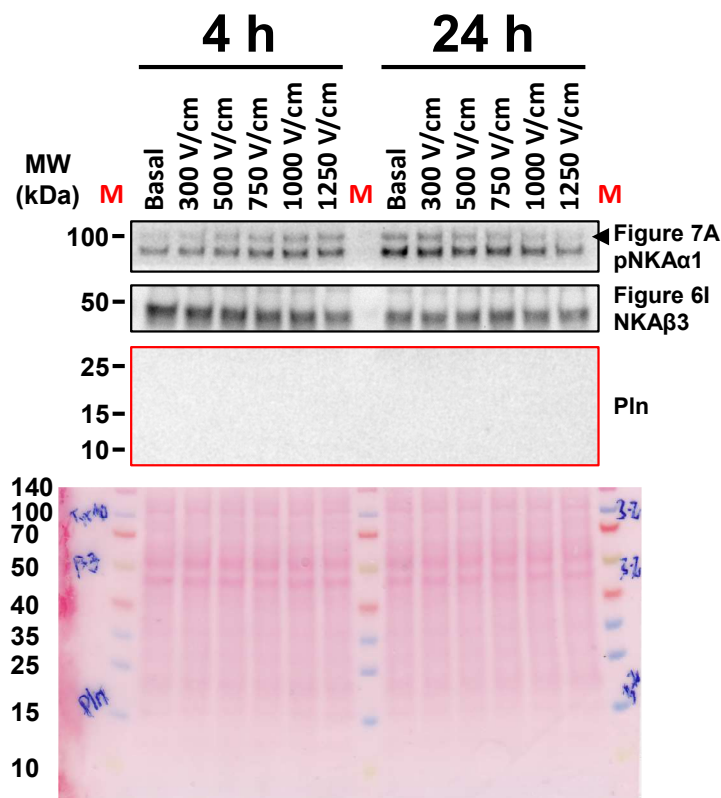

Red framed blots were excluded from statistical analyses either due to low intensity or no visible bands. Detections that were performed on stripped membranes are labelled with asterisks and green text

Immunoreactive bands were visualized using enhanced chemiluminescence using Alliance Q9 (Uvitec, UK) and Quantity One 1-D Analysis Software 4.6.8. (Bio-Rad, U.S.)

Loading and transfer were evaluated by Ponceau S (0.1% (w/v) in 5% (v/v) acetic acid) staining.

## Monopolar pulses

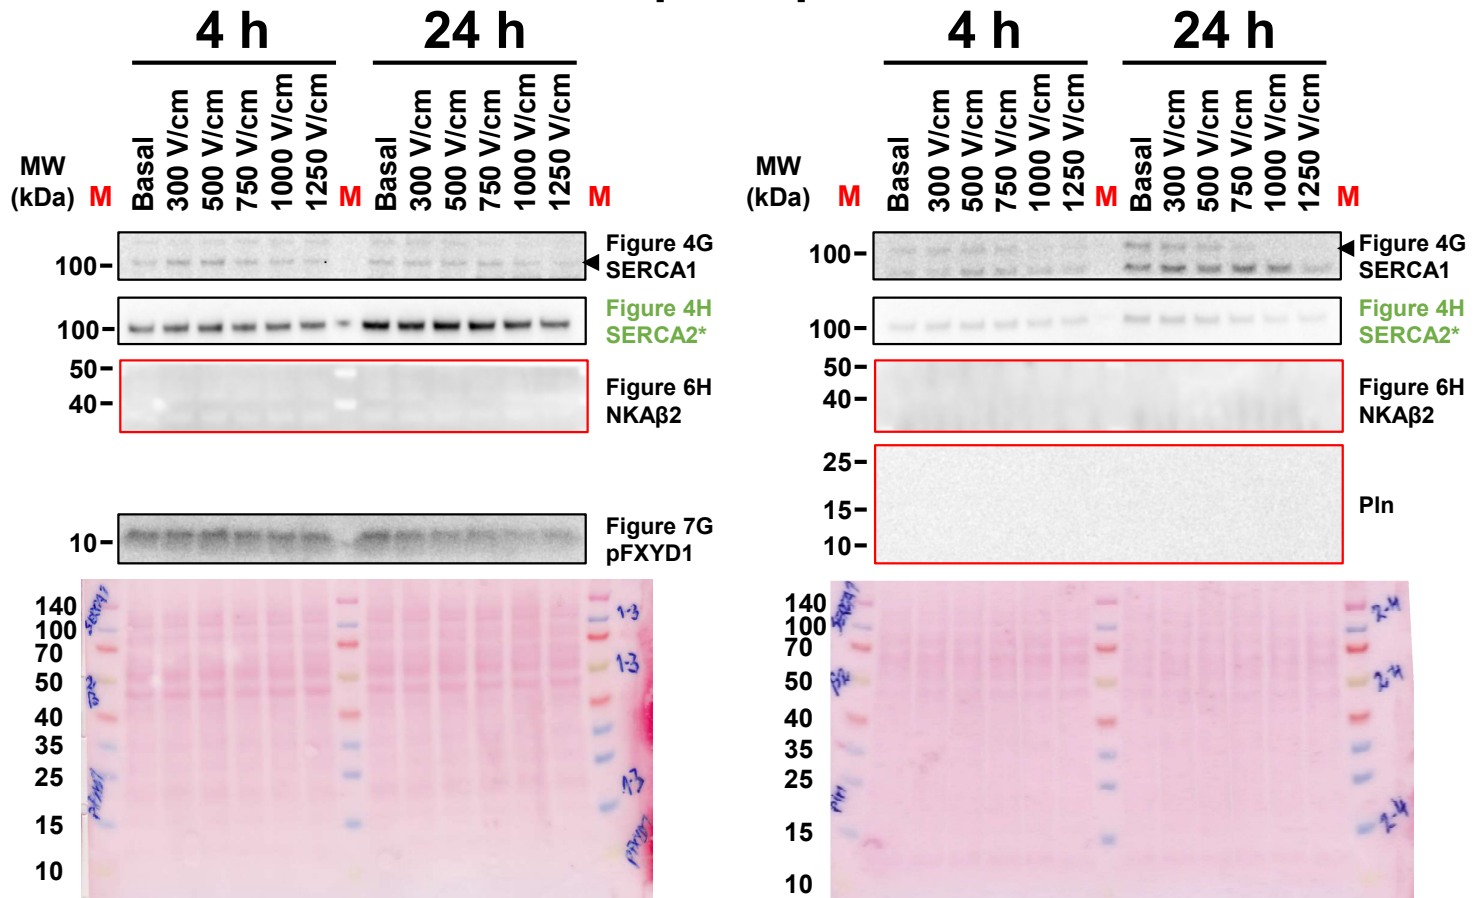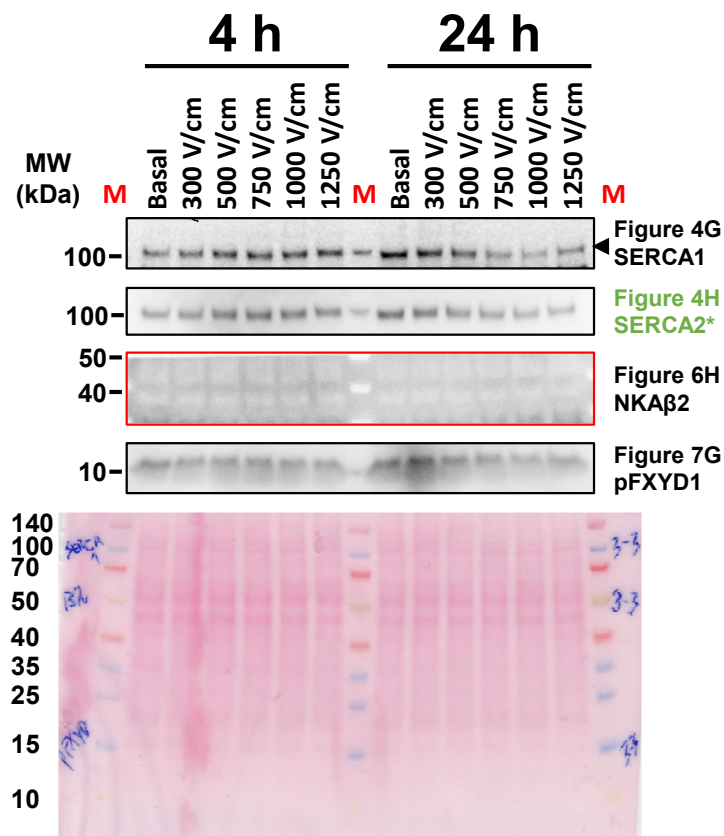

Red framed blots were excluded from statistical analyses either due to low intensity or no visible bands. Detections that were performed on stripped membranes are labelled with asterisks and green text

Immunoreactive bands were visualized using enhanced chemiluminescence using Alliance Q9 (Uvitec, UK) and Quantity One 1-D Analysis Software 4.6.8. (Bio-Rad, U.S.)

Loading and transfer were evaluated by Ponceau S (0.1% (w/v) in 5% (v/v) acetic acid) staining.

## Monopolar pulses

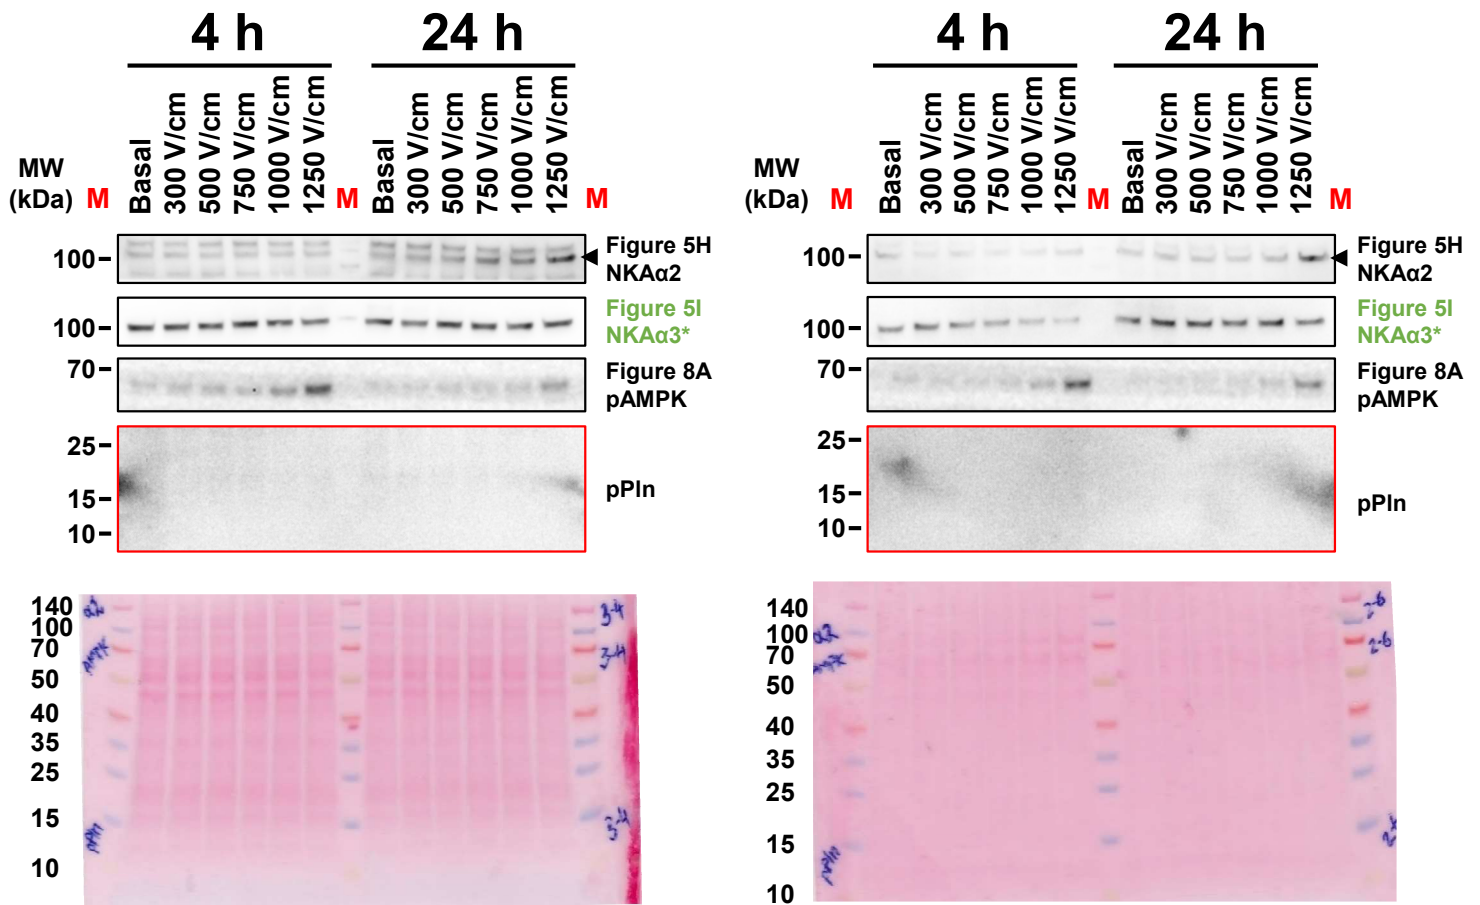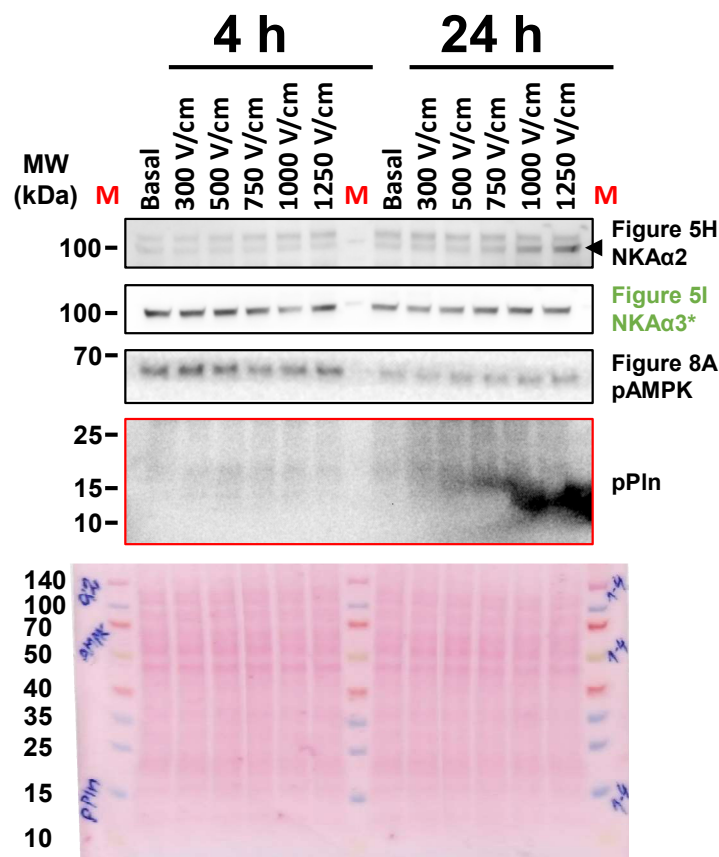

Red framed blots were excluded from statistical analyses either due to low intensity or no visible bands. Detections that were performed on stripped membranes are labelled with asterisks and green text



Immunoreactive bands were visualized using enhanced chemiluminescence using Alliance Q9 (Uvitec, UK) and Quantity One 1-D Analysis Software 4.6.8. (Bio-Rad, U.S.)

Loading and transfer were evaluated by Ponceau S (0.1% (w/v) in 5% (v/v) acetic acid) staining.

## Monopolar pulses

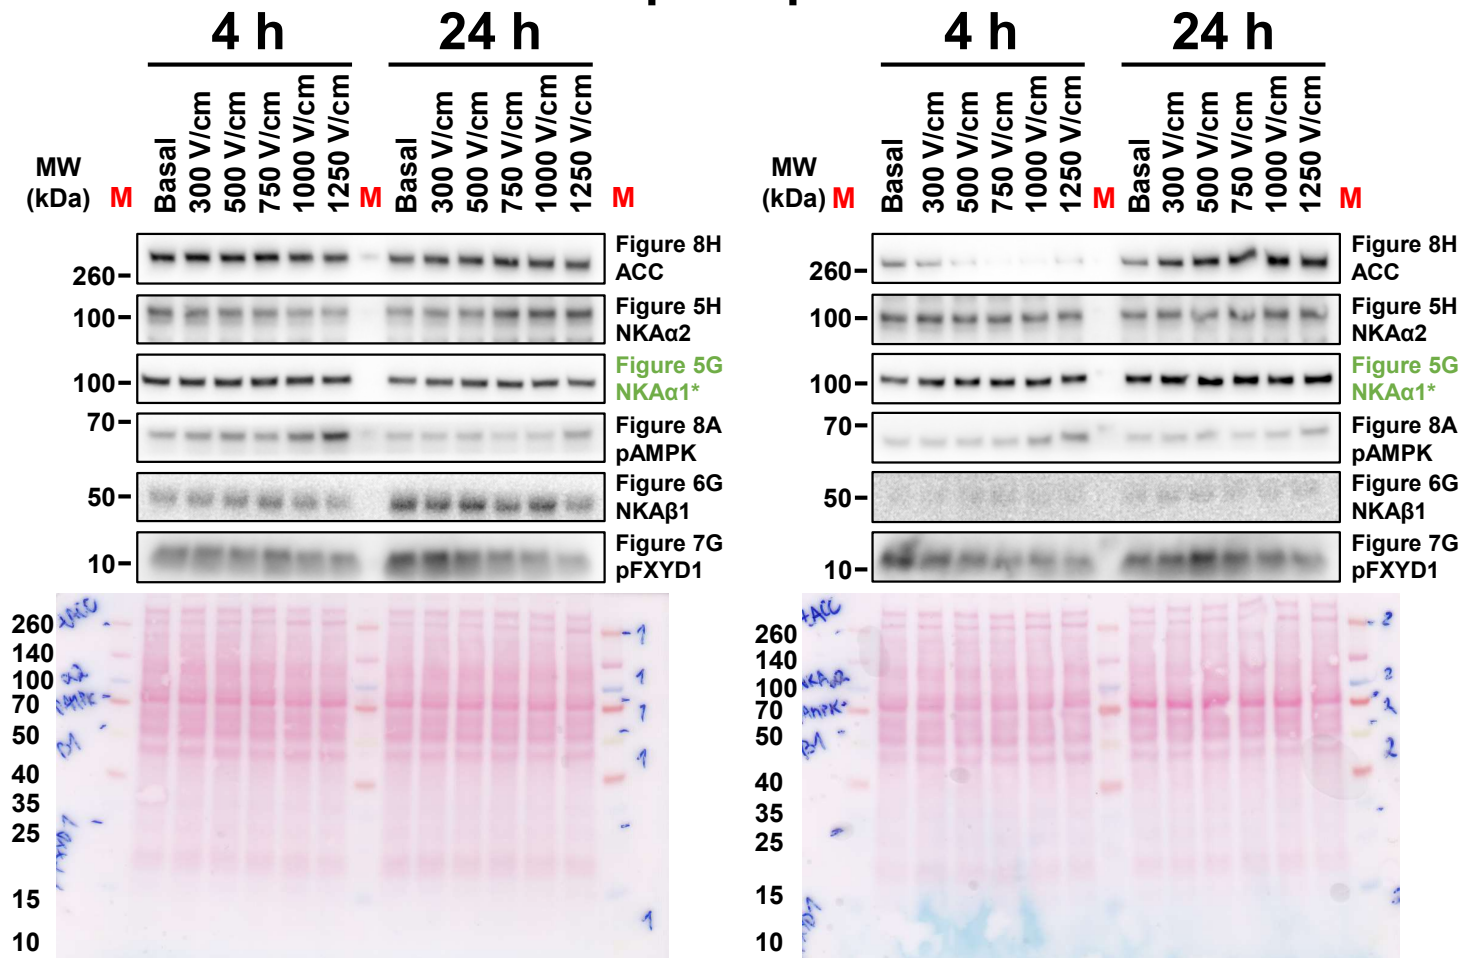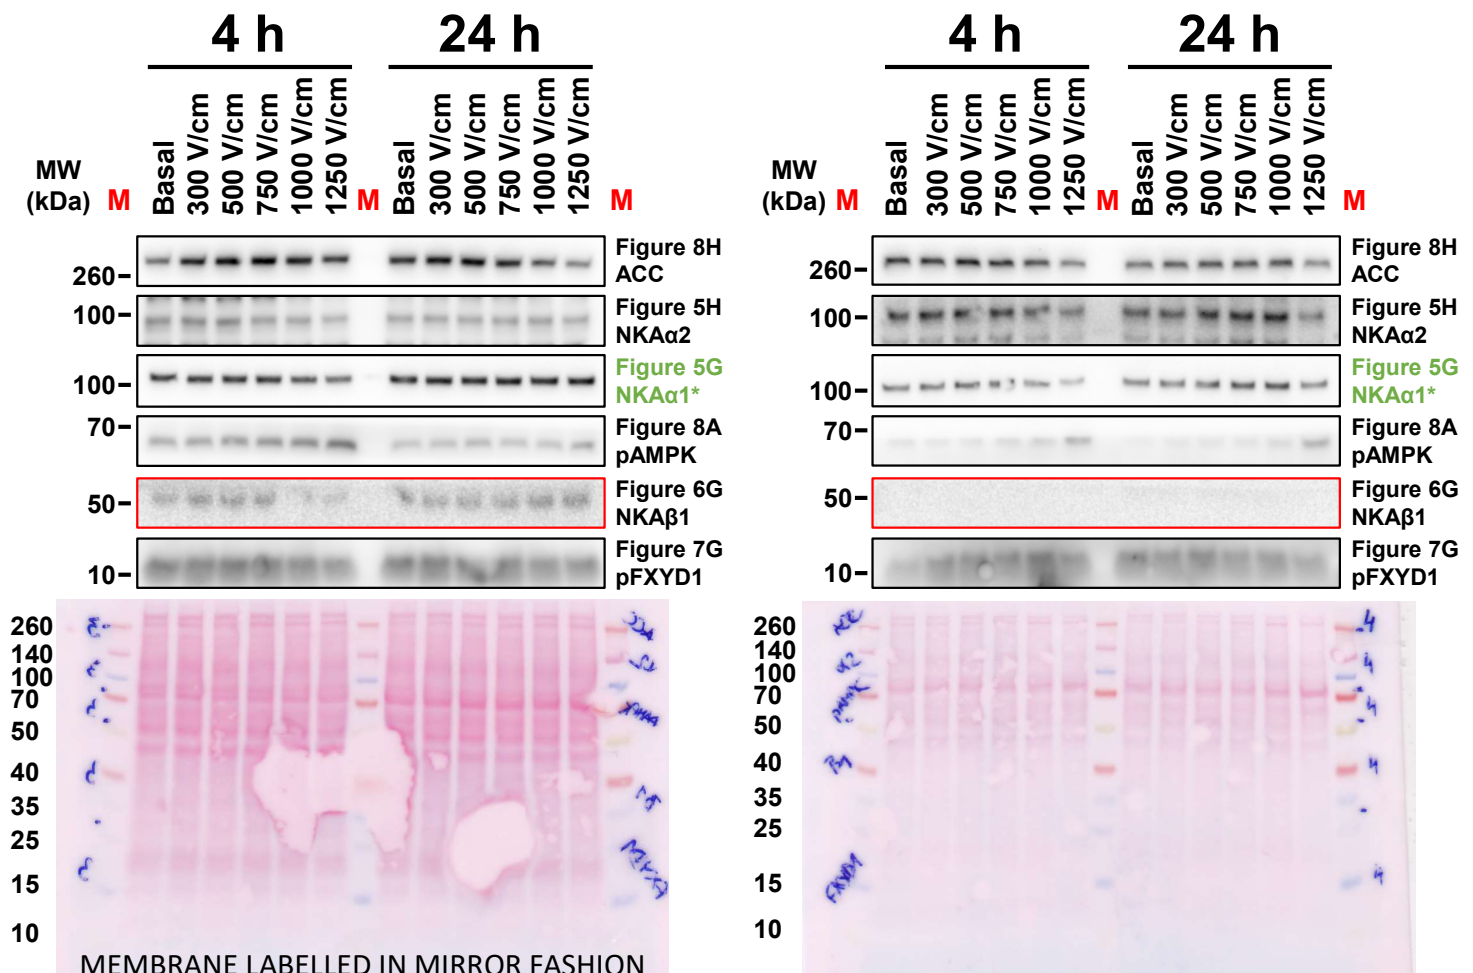

Red framed blots were excluded from statistical analyses either due to low intensity or no visible bands.

Detections that were performed on stripped membranes are labelled with asterisks and green text

Immunoreactive bands were visualized using enhanced chemiluminescence using Alliance Q9 (Uvitec, UK) and Quantity One 1-D Analysis Software 4.6.8. (Bio-Rad, U.S.)

Loading and transfer were evaluated by Ponceau S (0.1% (w/v) in 5% (v/v) acetic acid) staining.

## Monopolar pulses

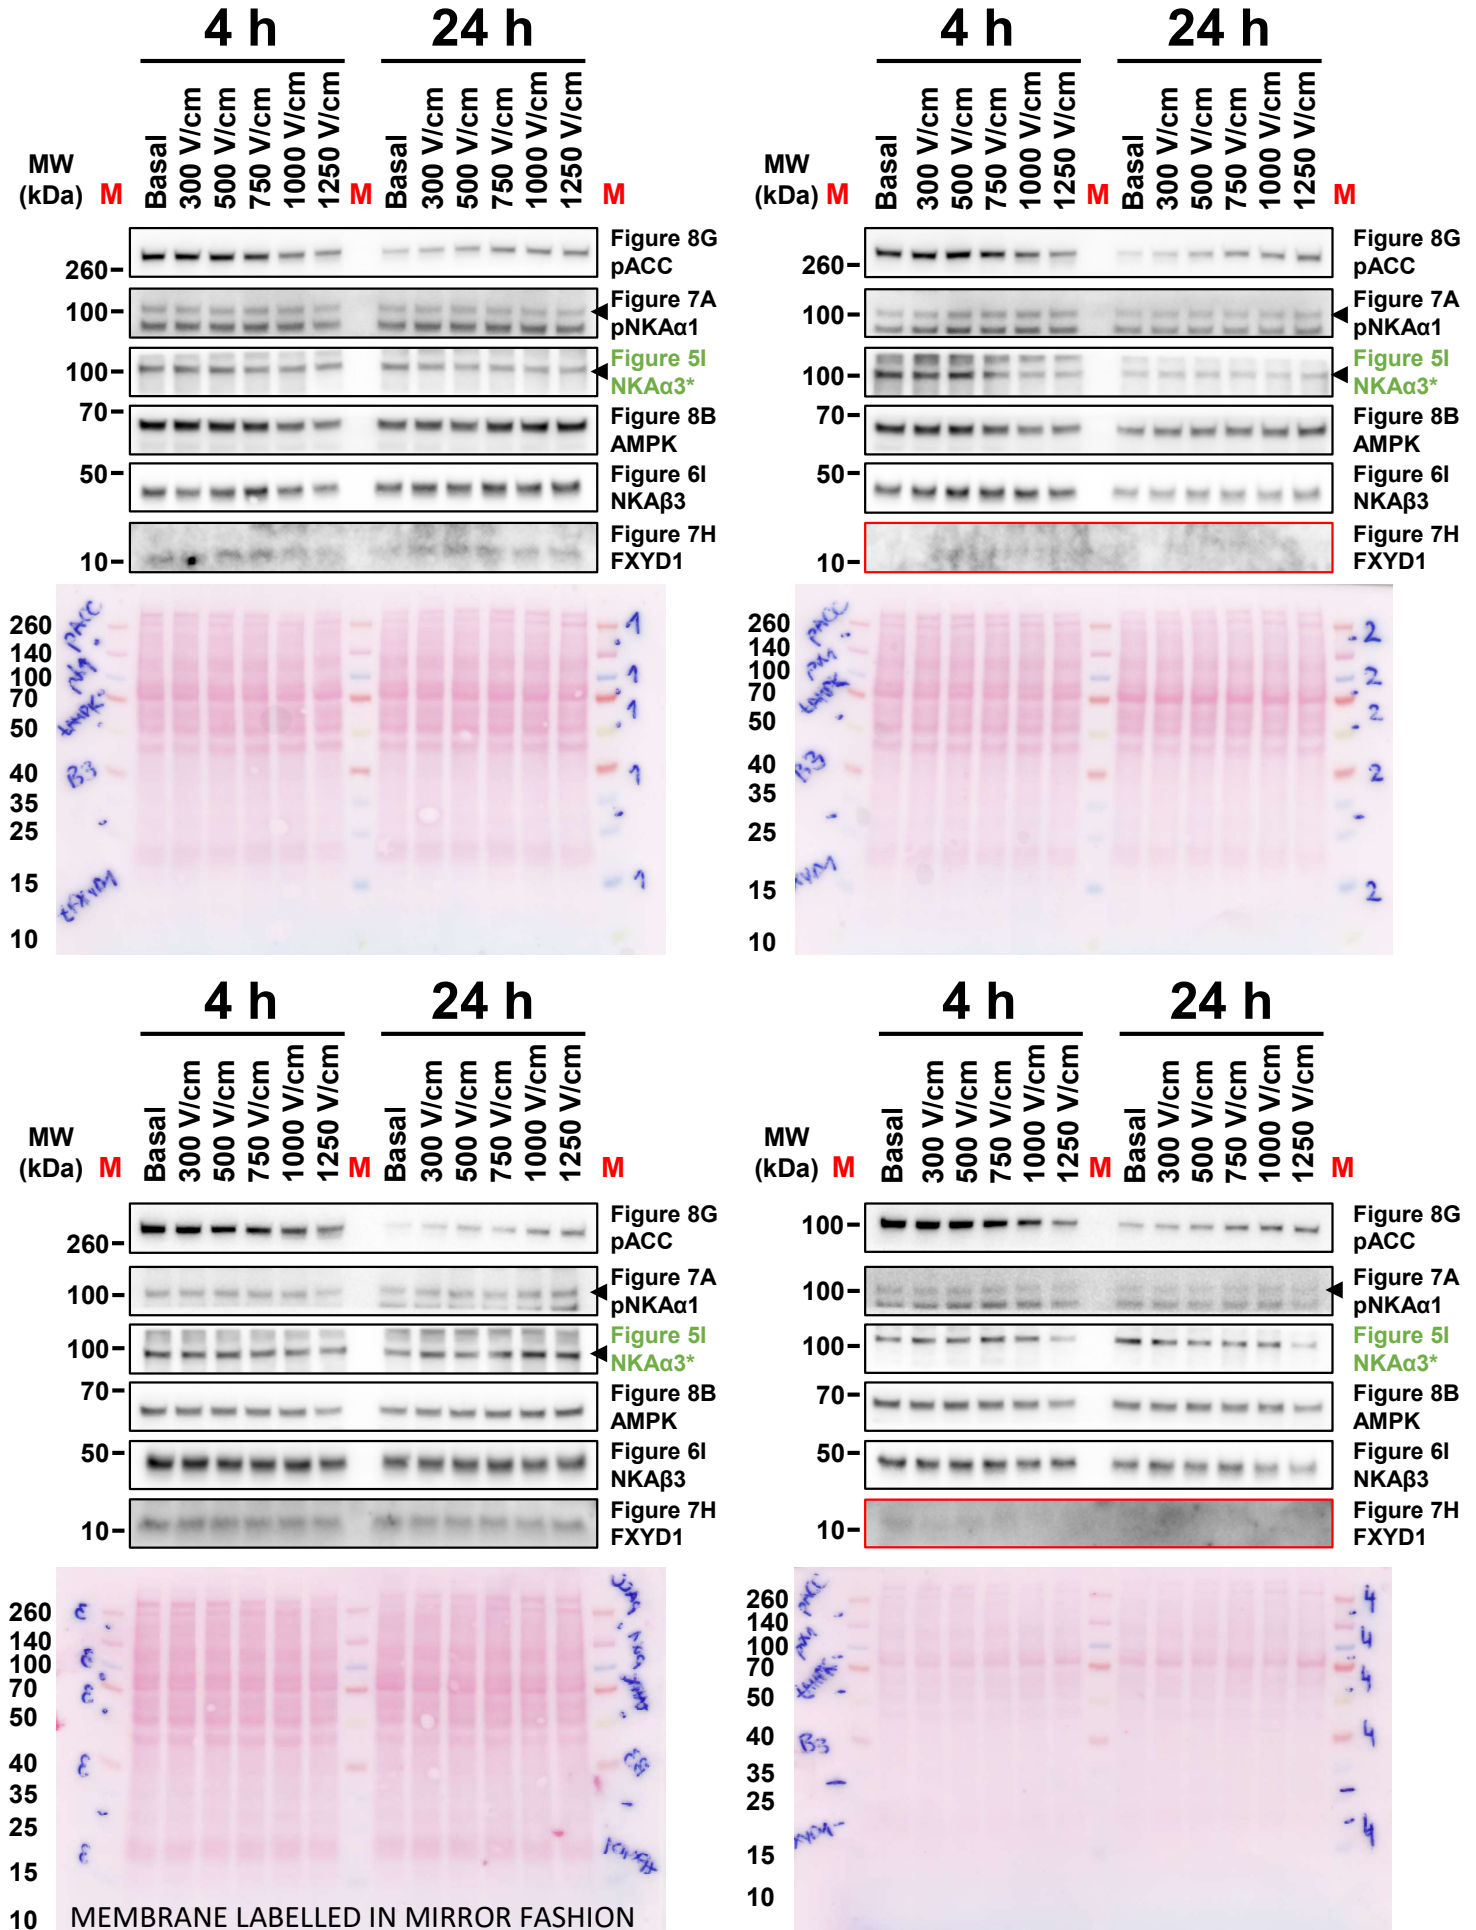

Red framed blots were excluded from statistical analyses either due to low intensity or no visible bands.

Detections that were performed on stripped membranes are labelled with asterisks and green text

Immunoreactive bands were visualized using enhanced chemiluminescence using Alliance Q9 (Uvitec, UK) and Quantity One 1-D Analysis Software 4.6.8. (Bio-Rad, U.S.)

Loading and transfer were evaluated by Ponceau S (0.1% (w/v) in 5% (v/v) acetic acid) staining.

## Monopolar pulses

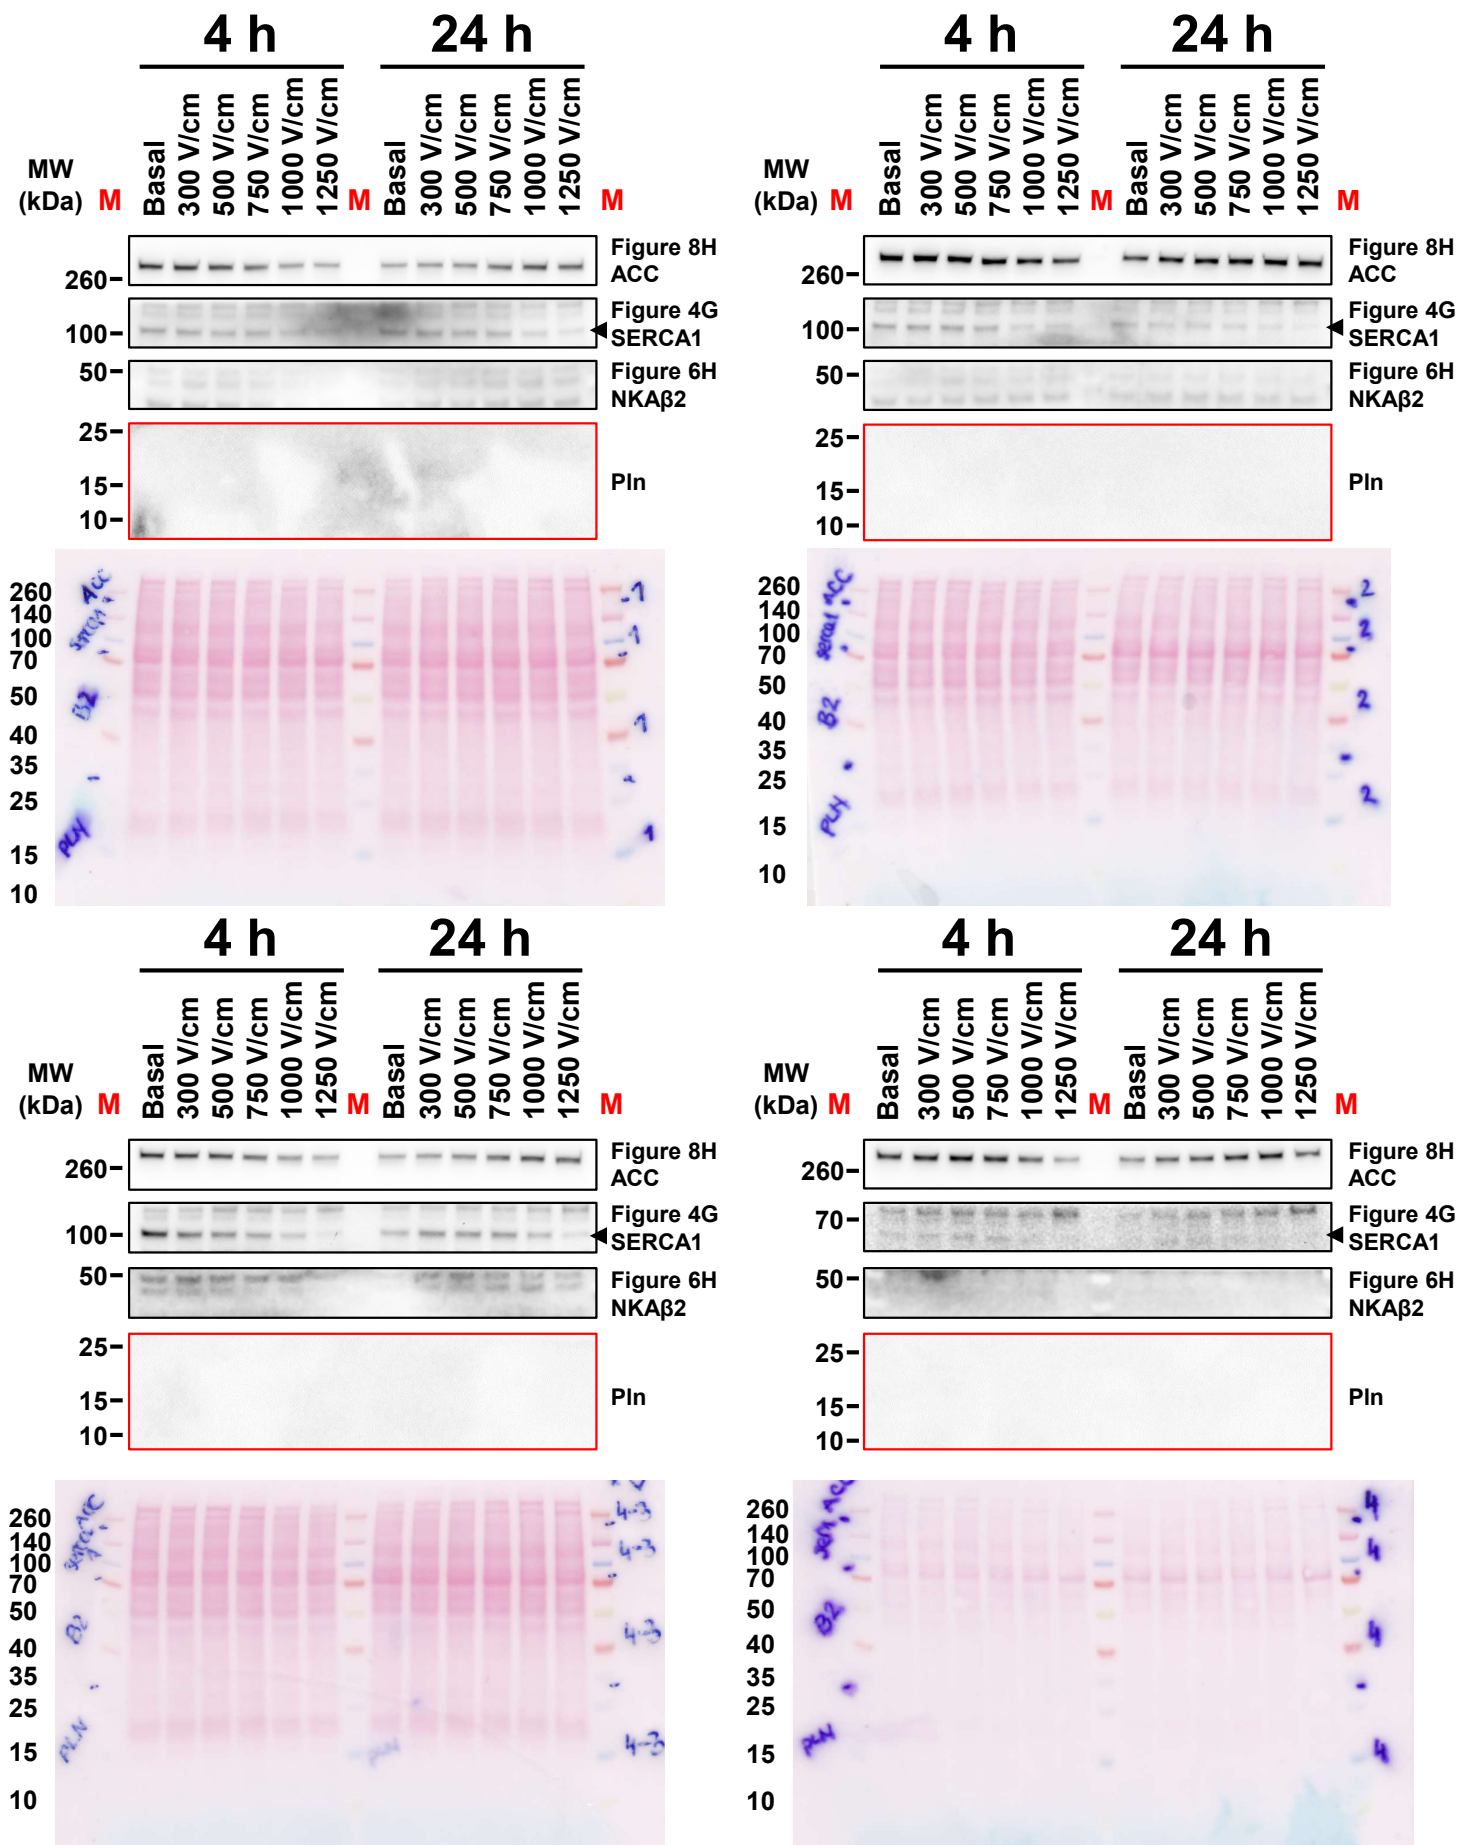

Red framed blots were excluded from statistical analyses either due to low intensity or no visible bands.

Detections that were performed on stripped membranes are labelled with asterisks and green text



Immunoreactive bands were visualized using enhanced chemiluminescence using Alliance Q9 (Uvitec, UK) and Quantity One 1-D Analysis Software 4.6.8. (Bio-Rad, U.S.)

Loading and transfer were evaluated by Ponceau S (0.1% (w/v) in 5% (v/v) acetic acid) staining.

## Monopolar pulses

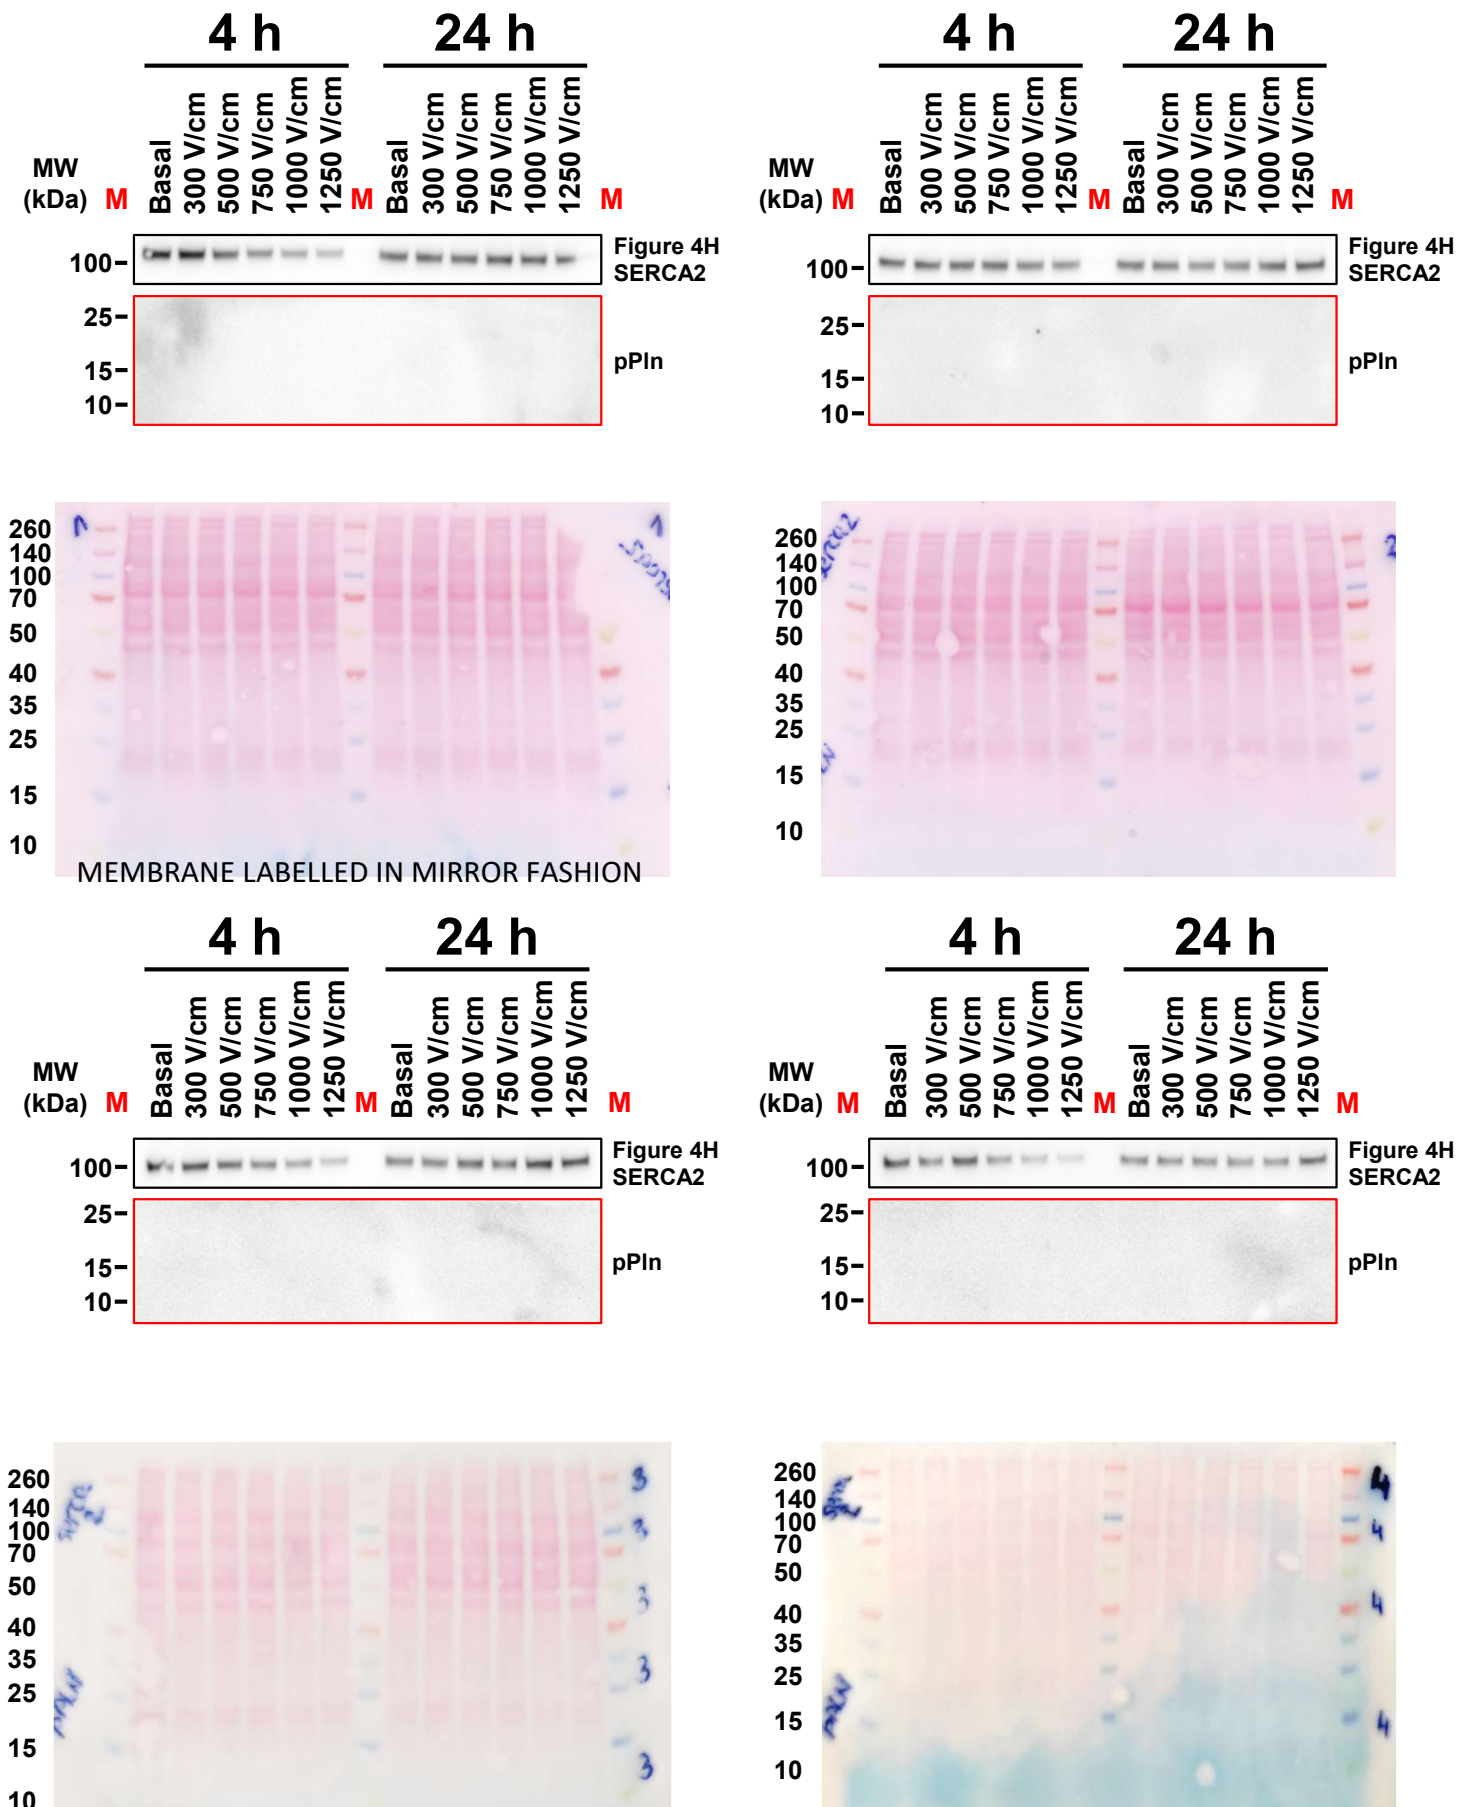

Red framed blots were excluded from statistical analyses either due to low intensity or no visible bands. Detections that were performed on stripped membranes are labelled with asterisks and green text

Immunoreactive bands were visualized using enhanced chemiluminescence using Alliance Q9 (Uvitec, UK) and Quantity One 1-D Analysis Software 4.6.8. (Bio-Rad, U.S.)

Loading and transfer were evaluated by Ponceau S (0.1% (w/v) in 5% (v/v) acetic acid) staining.

## Bipolar pulses

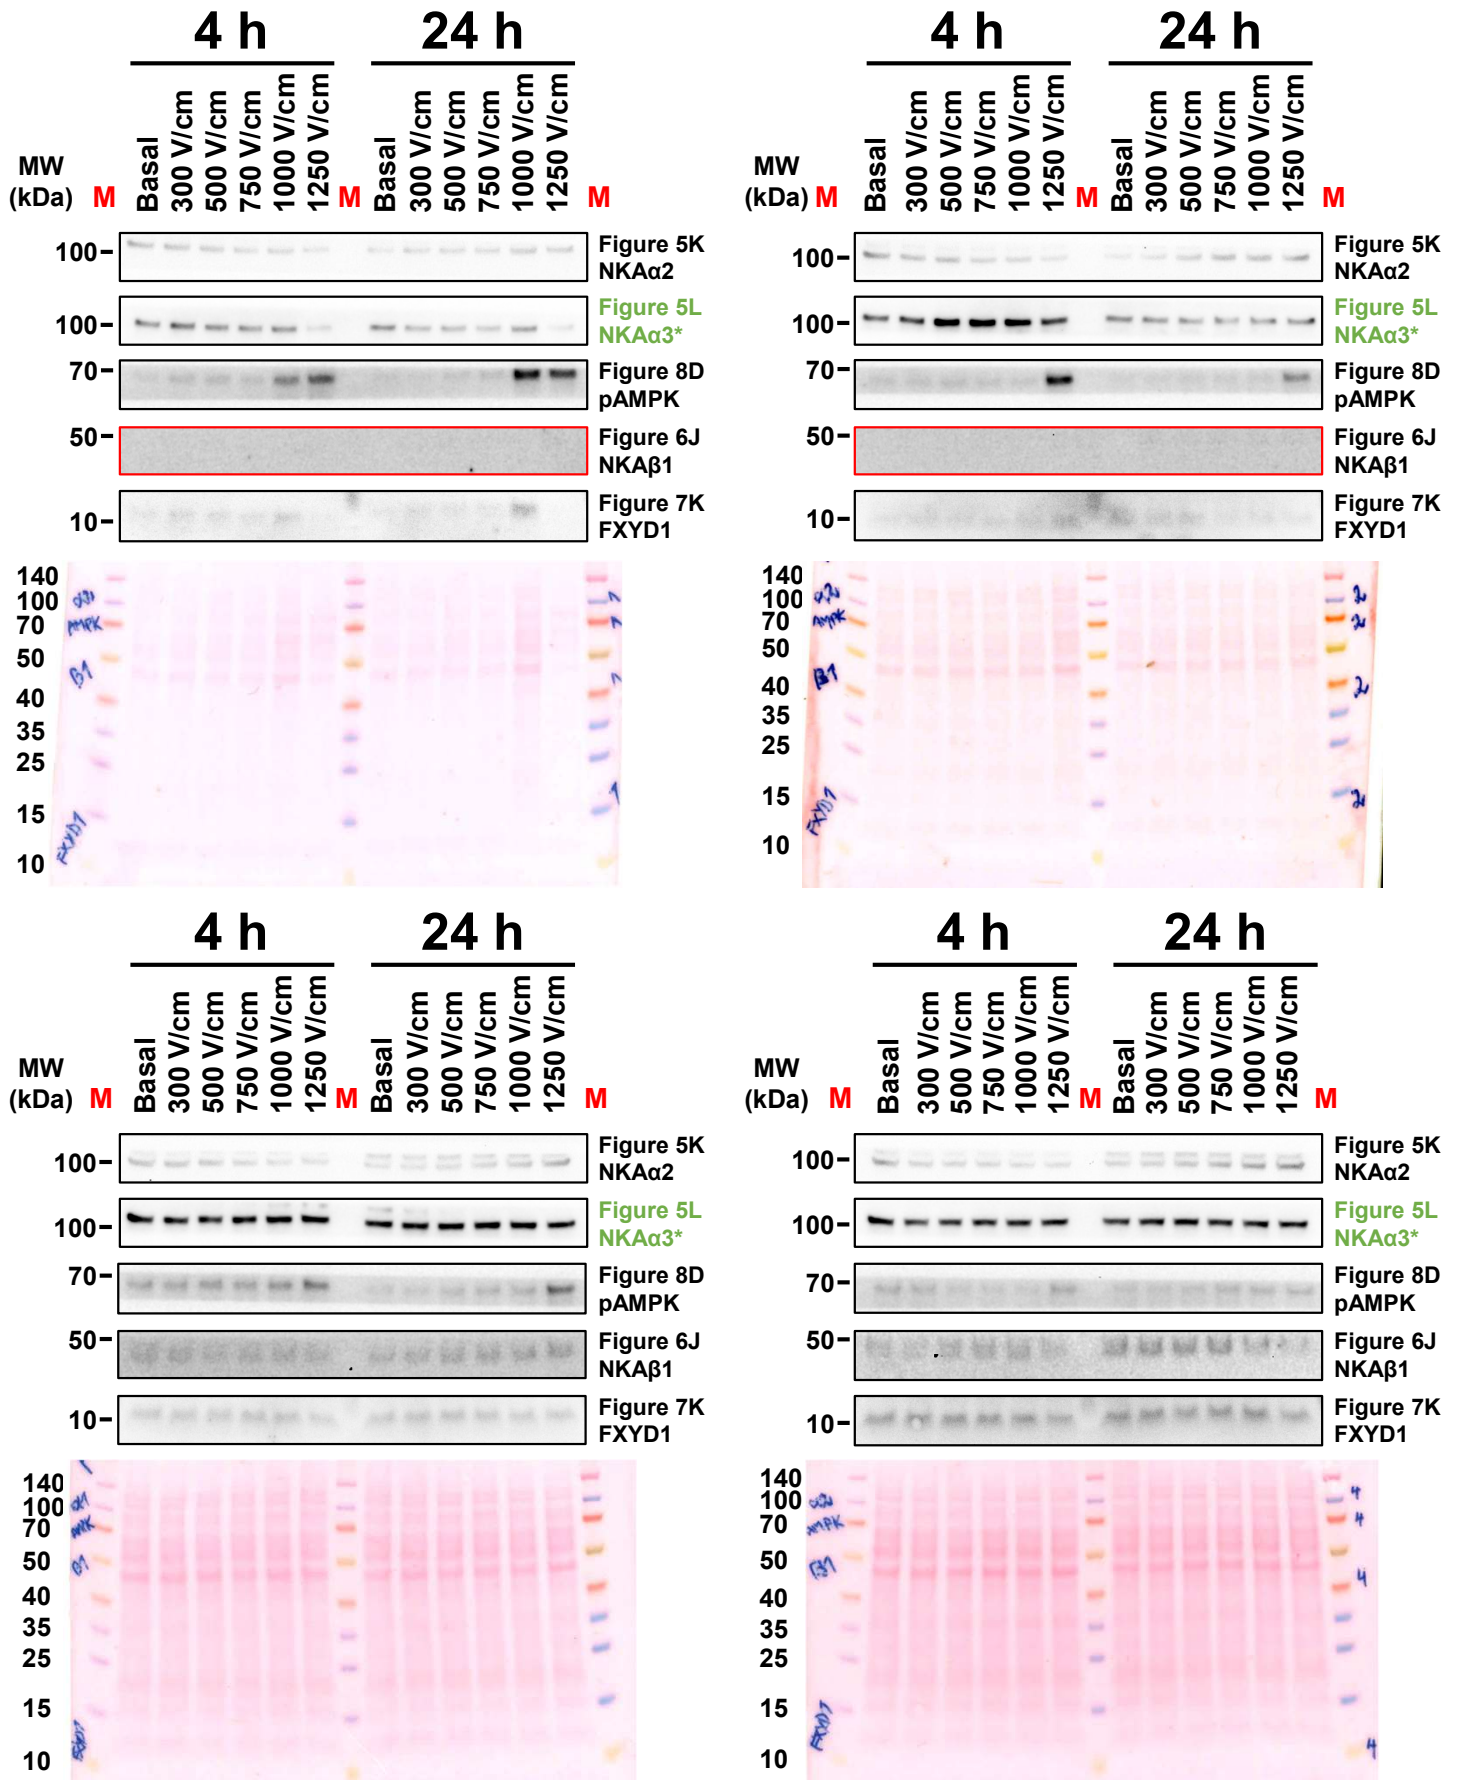

Red framed blots were excluded from statistical analyses either due to low intensity or no visible bands. Detections that were performed on stripped membranes are labelled with asterisks and green text

Immunoreactive bands were visualized using enhanced chemiluminescence using Alliance Q9 (Uvitec, UK) and Quantity One 1-D Analysis Software 4.6.8. (Bio-Rad, U.S.)

Loading and transfer were evaluated by Ponceau S (0.1% (w/v) in 5% (v/v) acetic acid) staining.

## Bipolar pulses

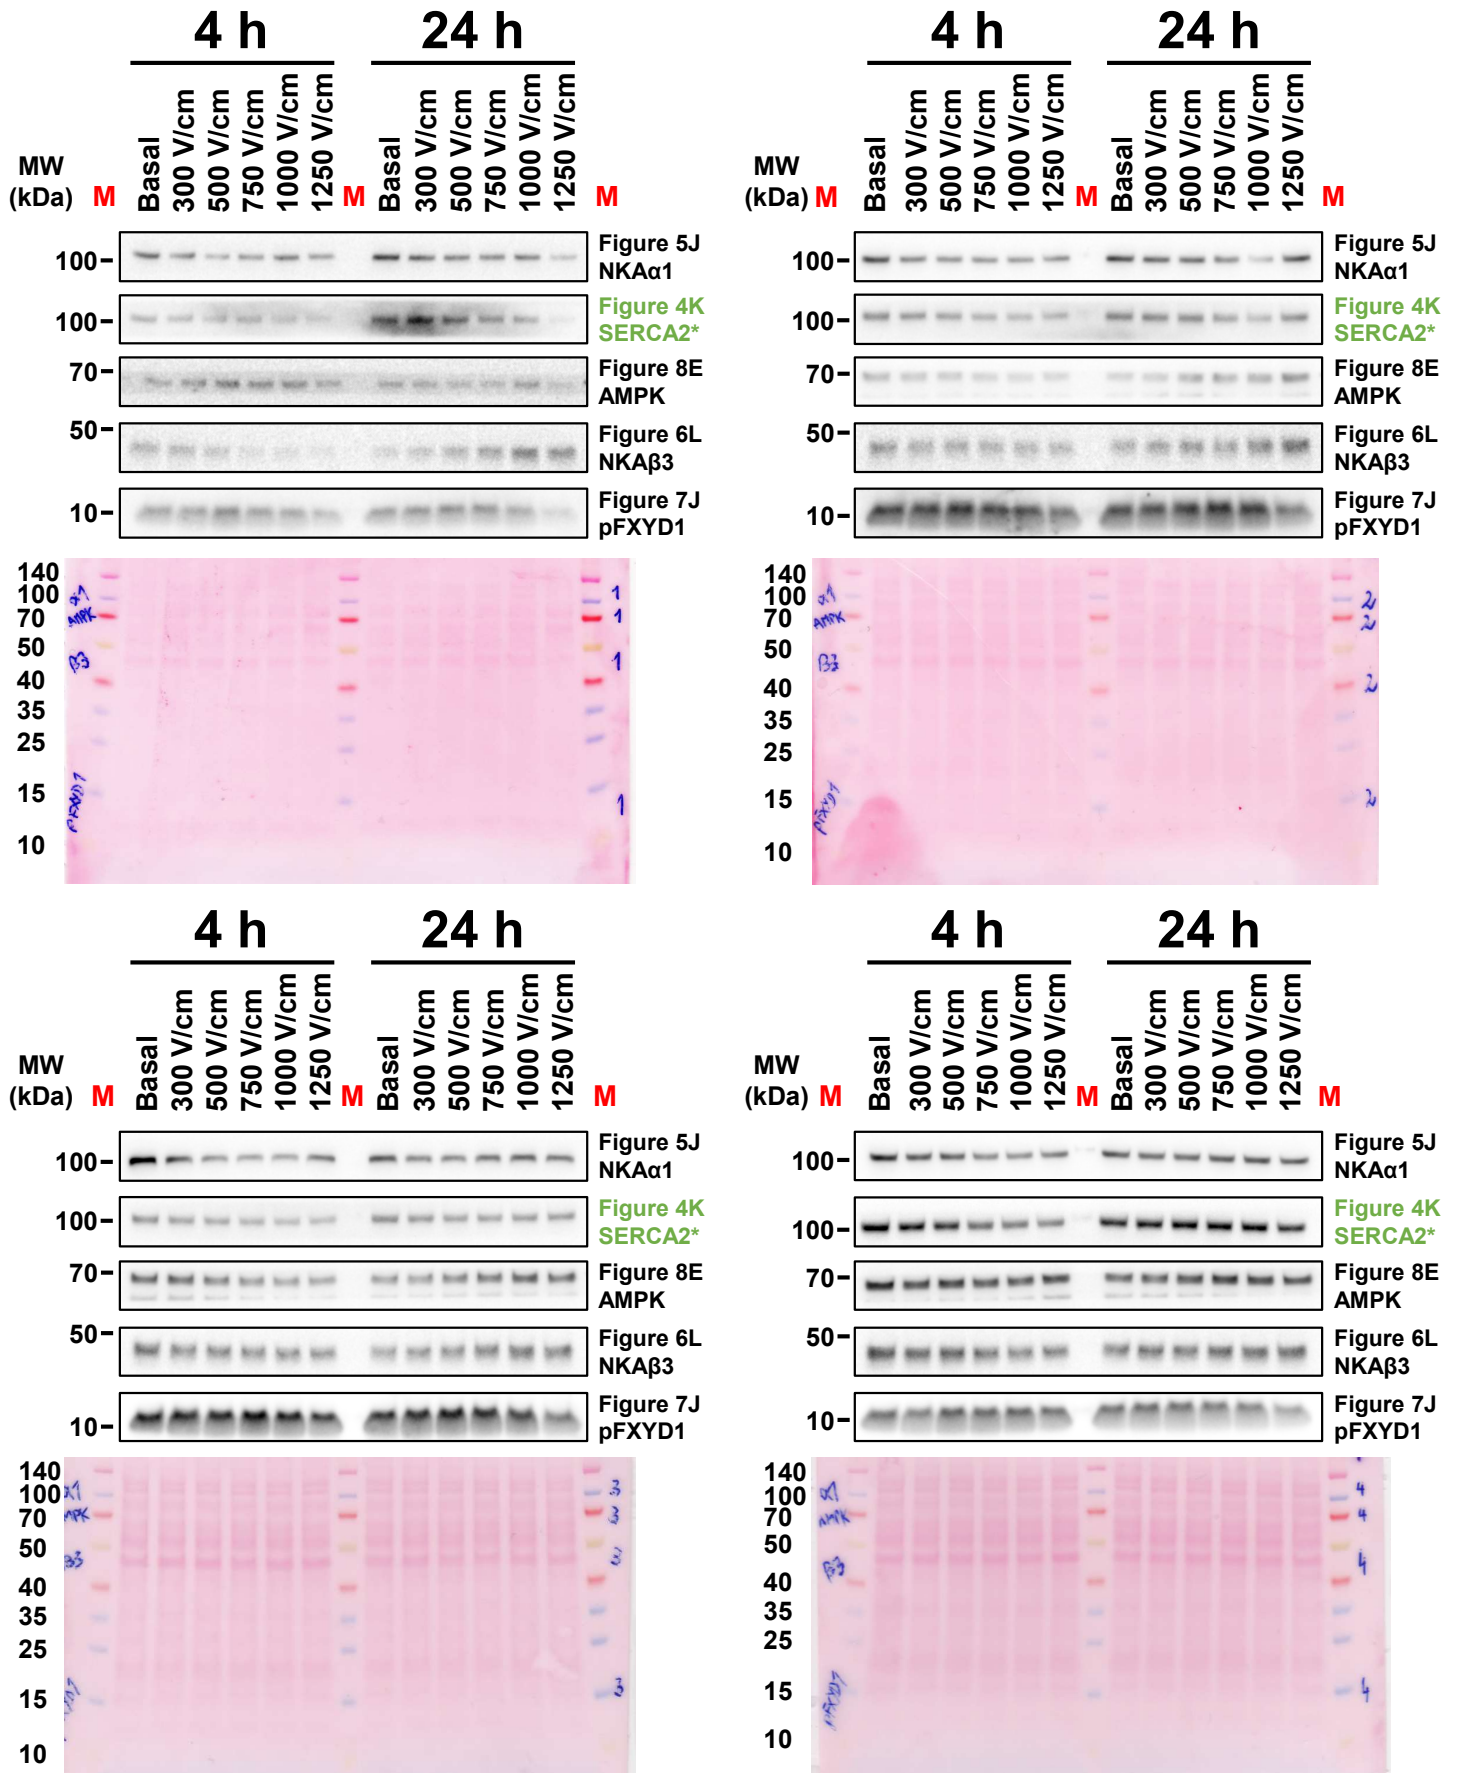

Red framed blots were excluded from statistical analyses either due to low intensity or no visible bands.

Detections that were performed on stripped membranes are labelled with asterisks and green text

Immunoreactive bands were visualized using enhanced chemiluminescence using Alliance Q9 (Uvitec, UK) and Quantity One 1-D Analysis Software 4.6.8. (Bio-Rad, U.S.)

Loading and transfer were evaluated by Ponceau S (0.1% (w/v) in 5% (v/v) acetic acid) staining.

## Bipolar pulses

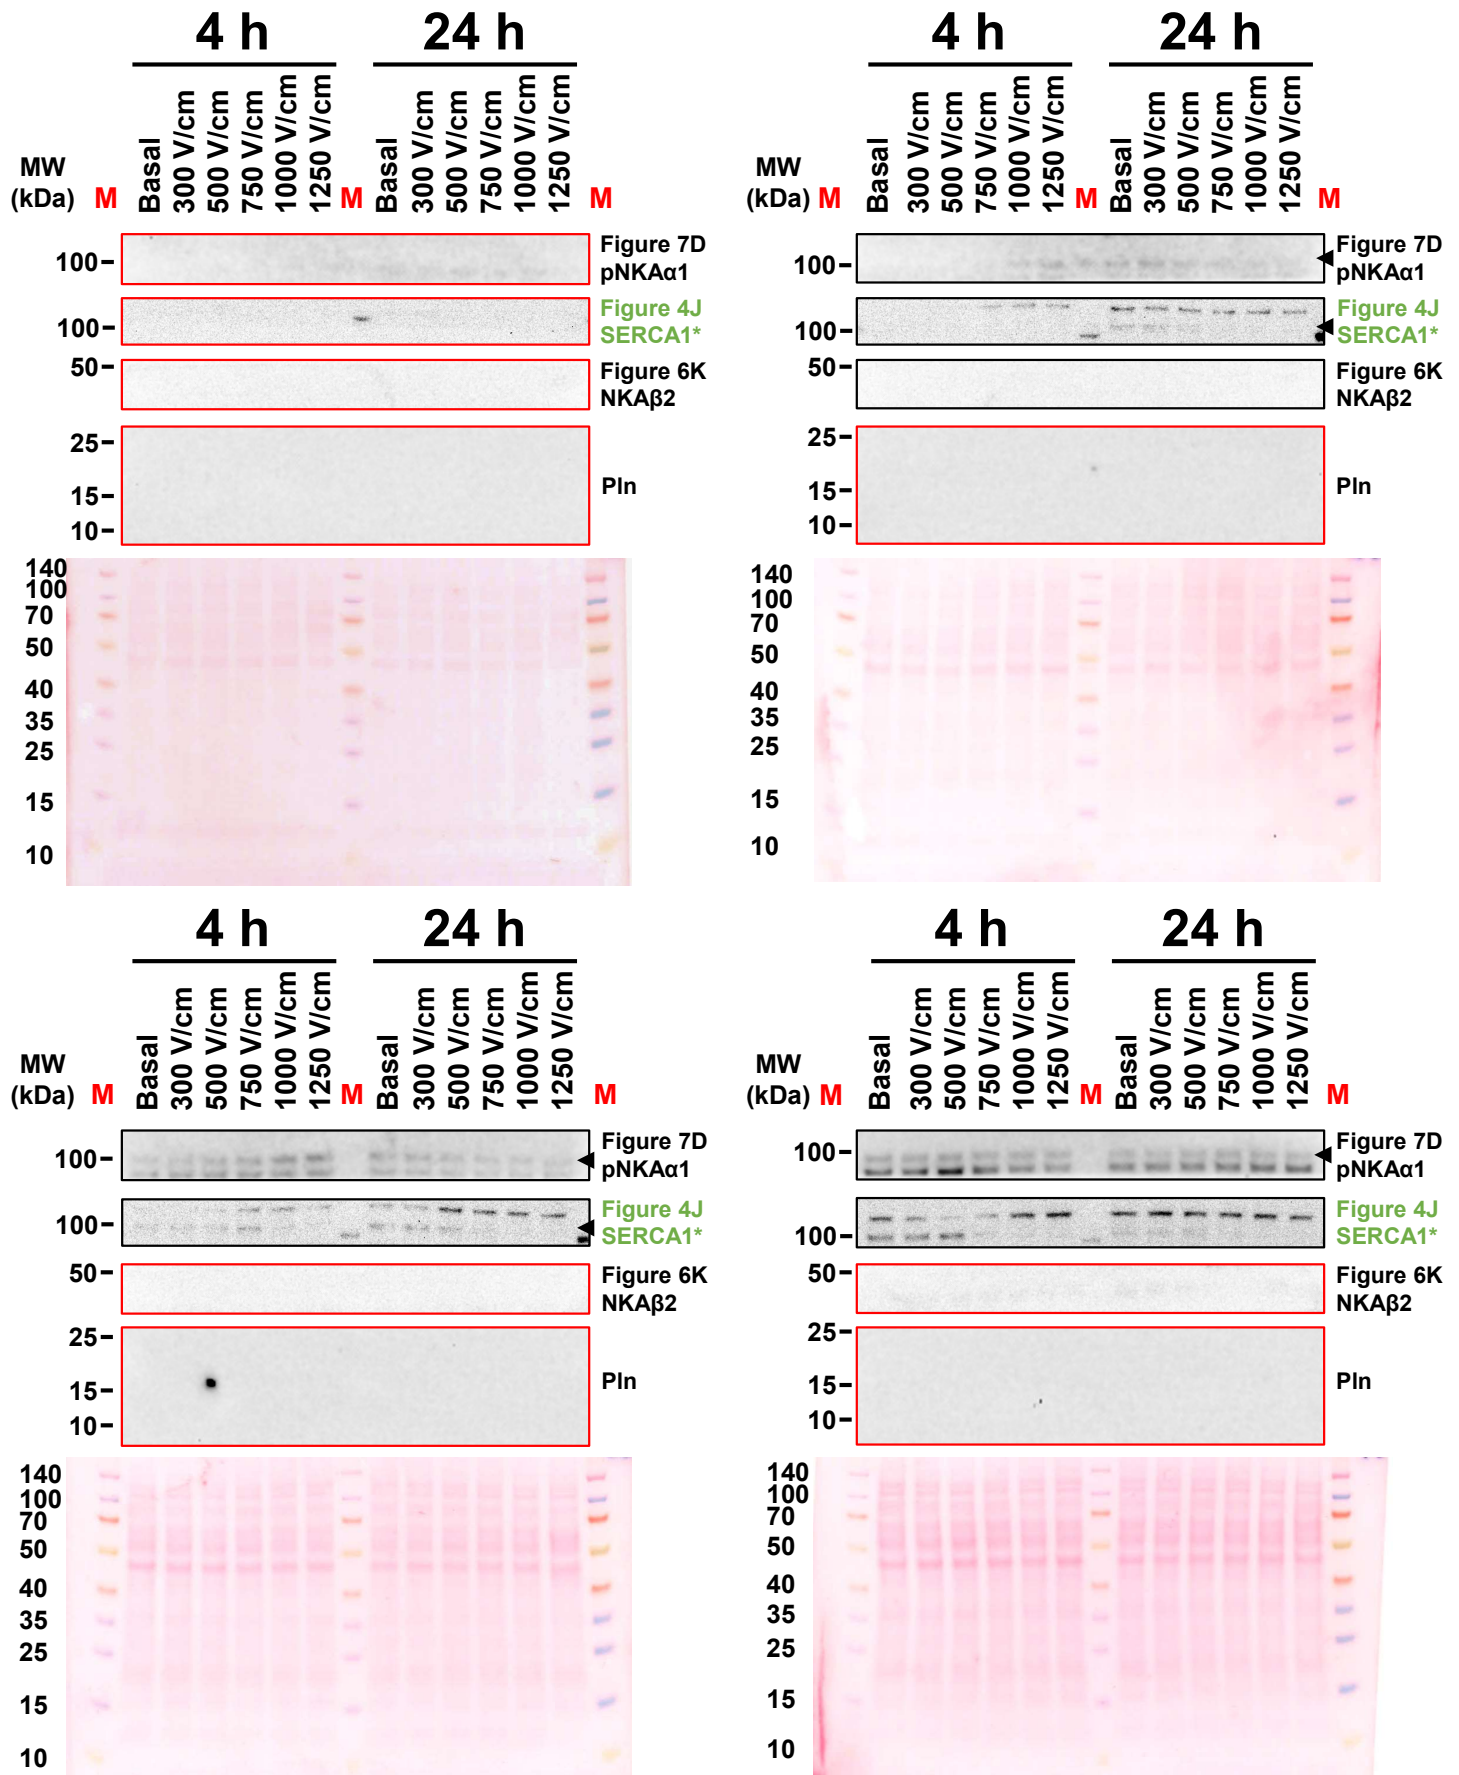

Red framed blots were excluded from statistical analyses either due to low intensity or no visible bands. Detections that were performed on stripped membranes are labelled with asterisks and green text



Immunoreactive bands were visualized using enhanced chemiluminescence using Alliance Q9 (Uvitec, UK) and Quantity One 1-D Analysis Software 4.6.8. (Bio-Rad, U.S.)

Loading and transfer were evaluated by Ponceau S (0.1% (w/v) in 5% (v/v) acetic acid) staining.

## Bipolar pulses

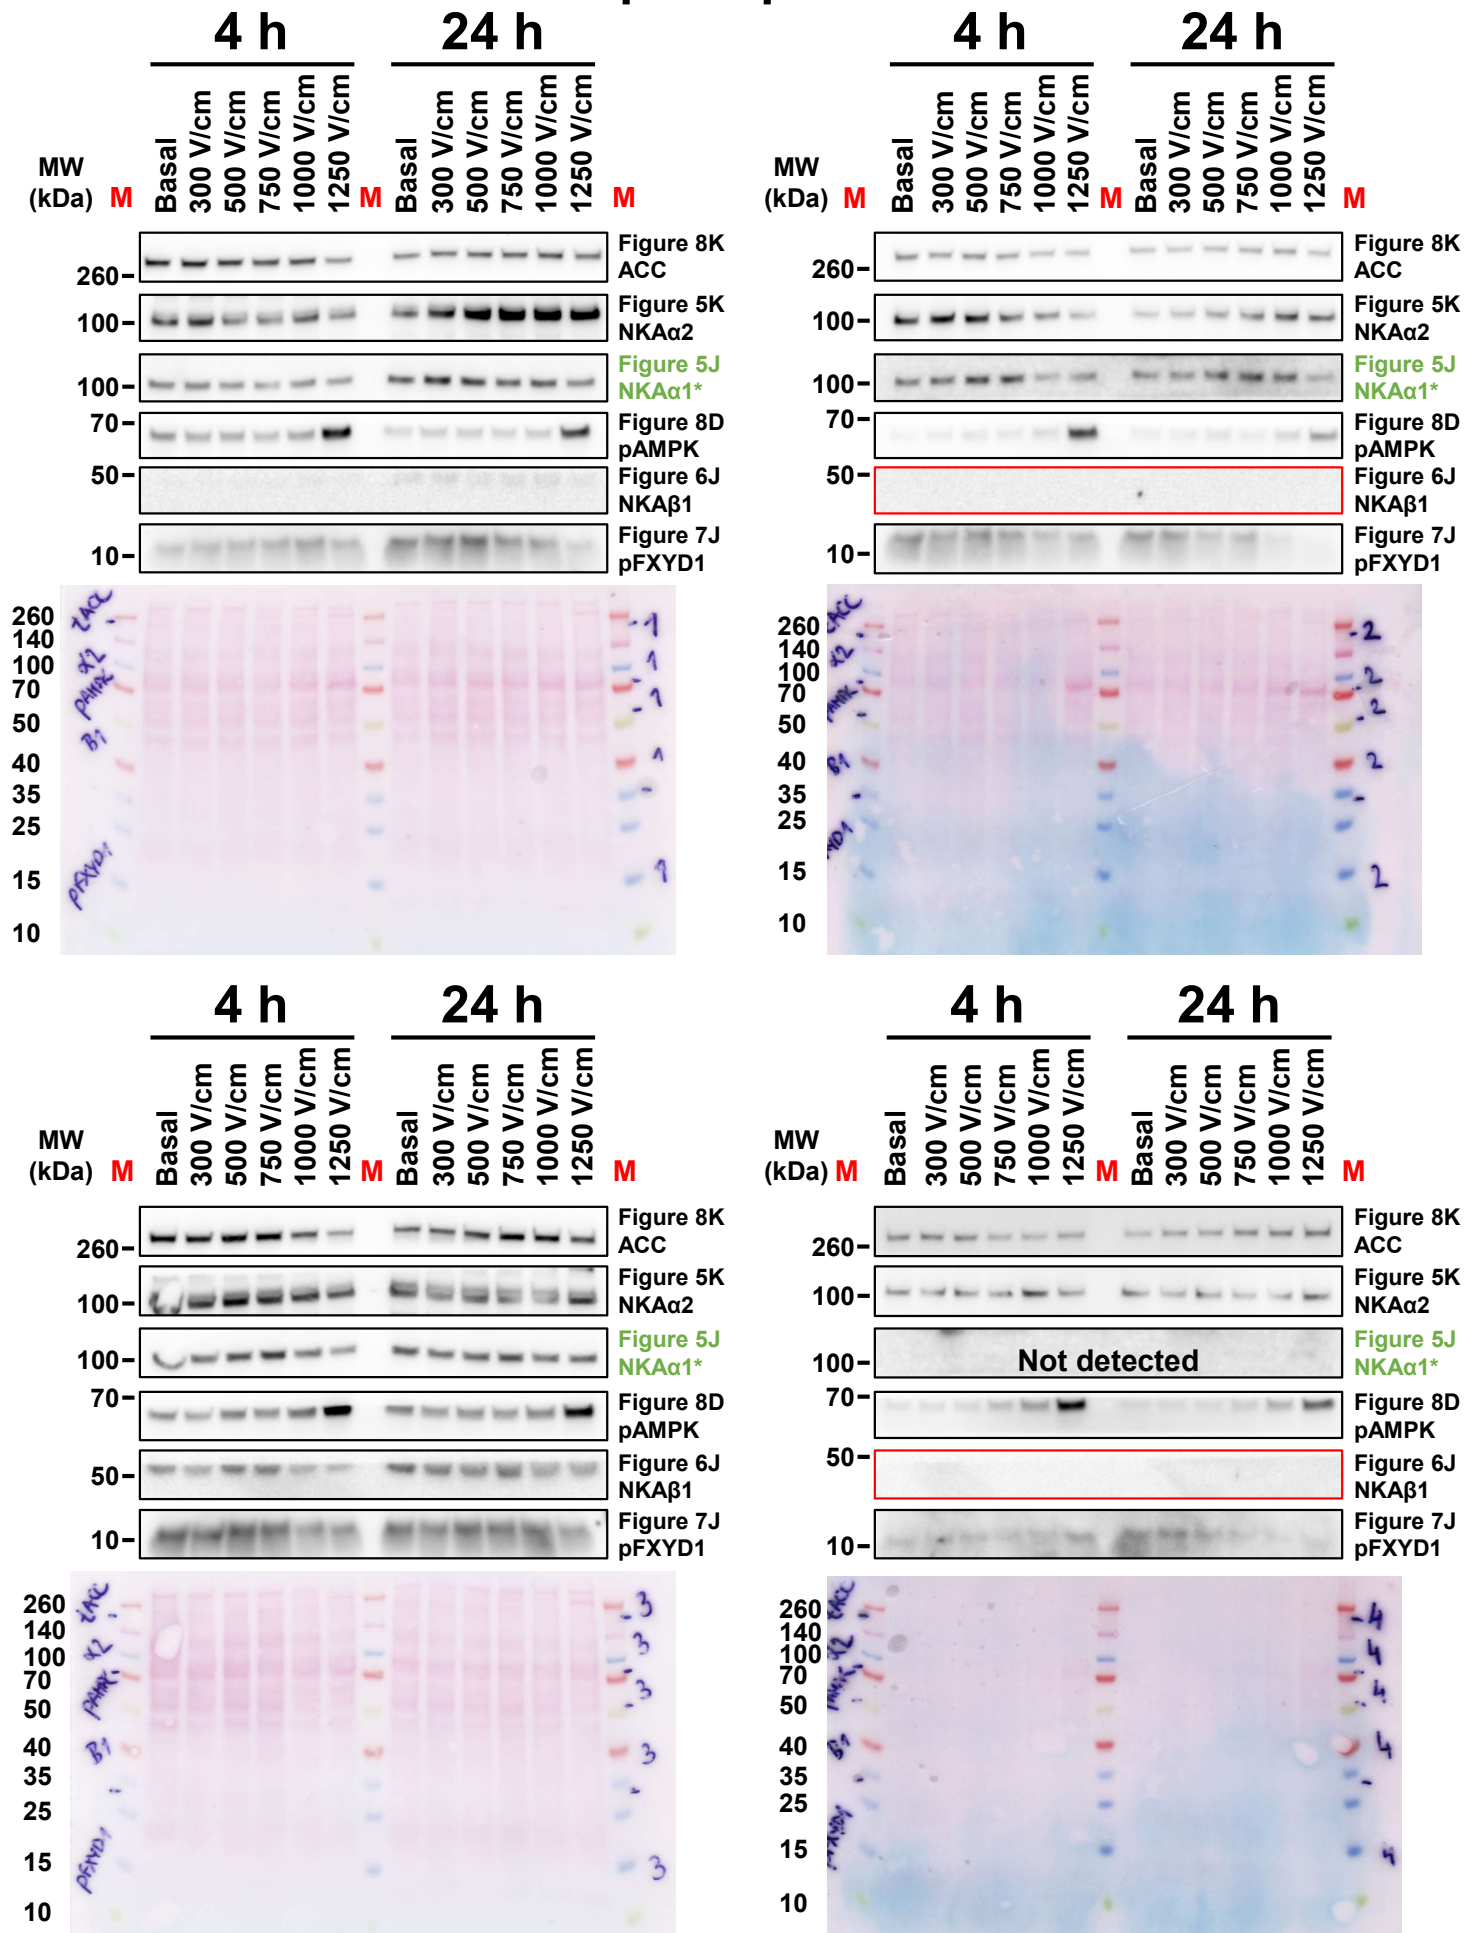



Immunoreactive bands were visualized using enhanced chemiluminescence using Alliance Q9 (Uvitec, UK) and Quantity One 1-D Analysis Software 4.6.8. (Bio-Rad, U.S.)

Loading and transfer were evaluated by Ponceau S (0.1% (w/v) in 5% (v/v) acetic acid) staining.

## Bipolar pulses

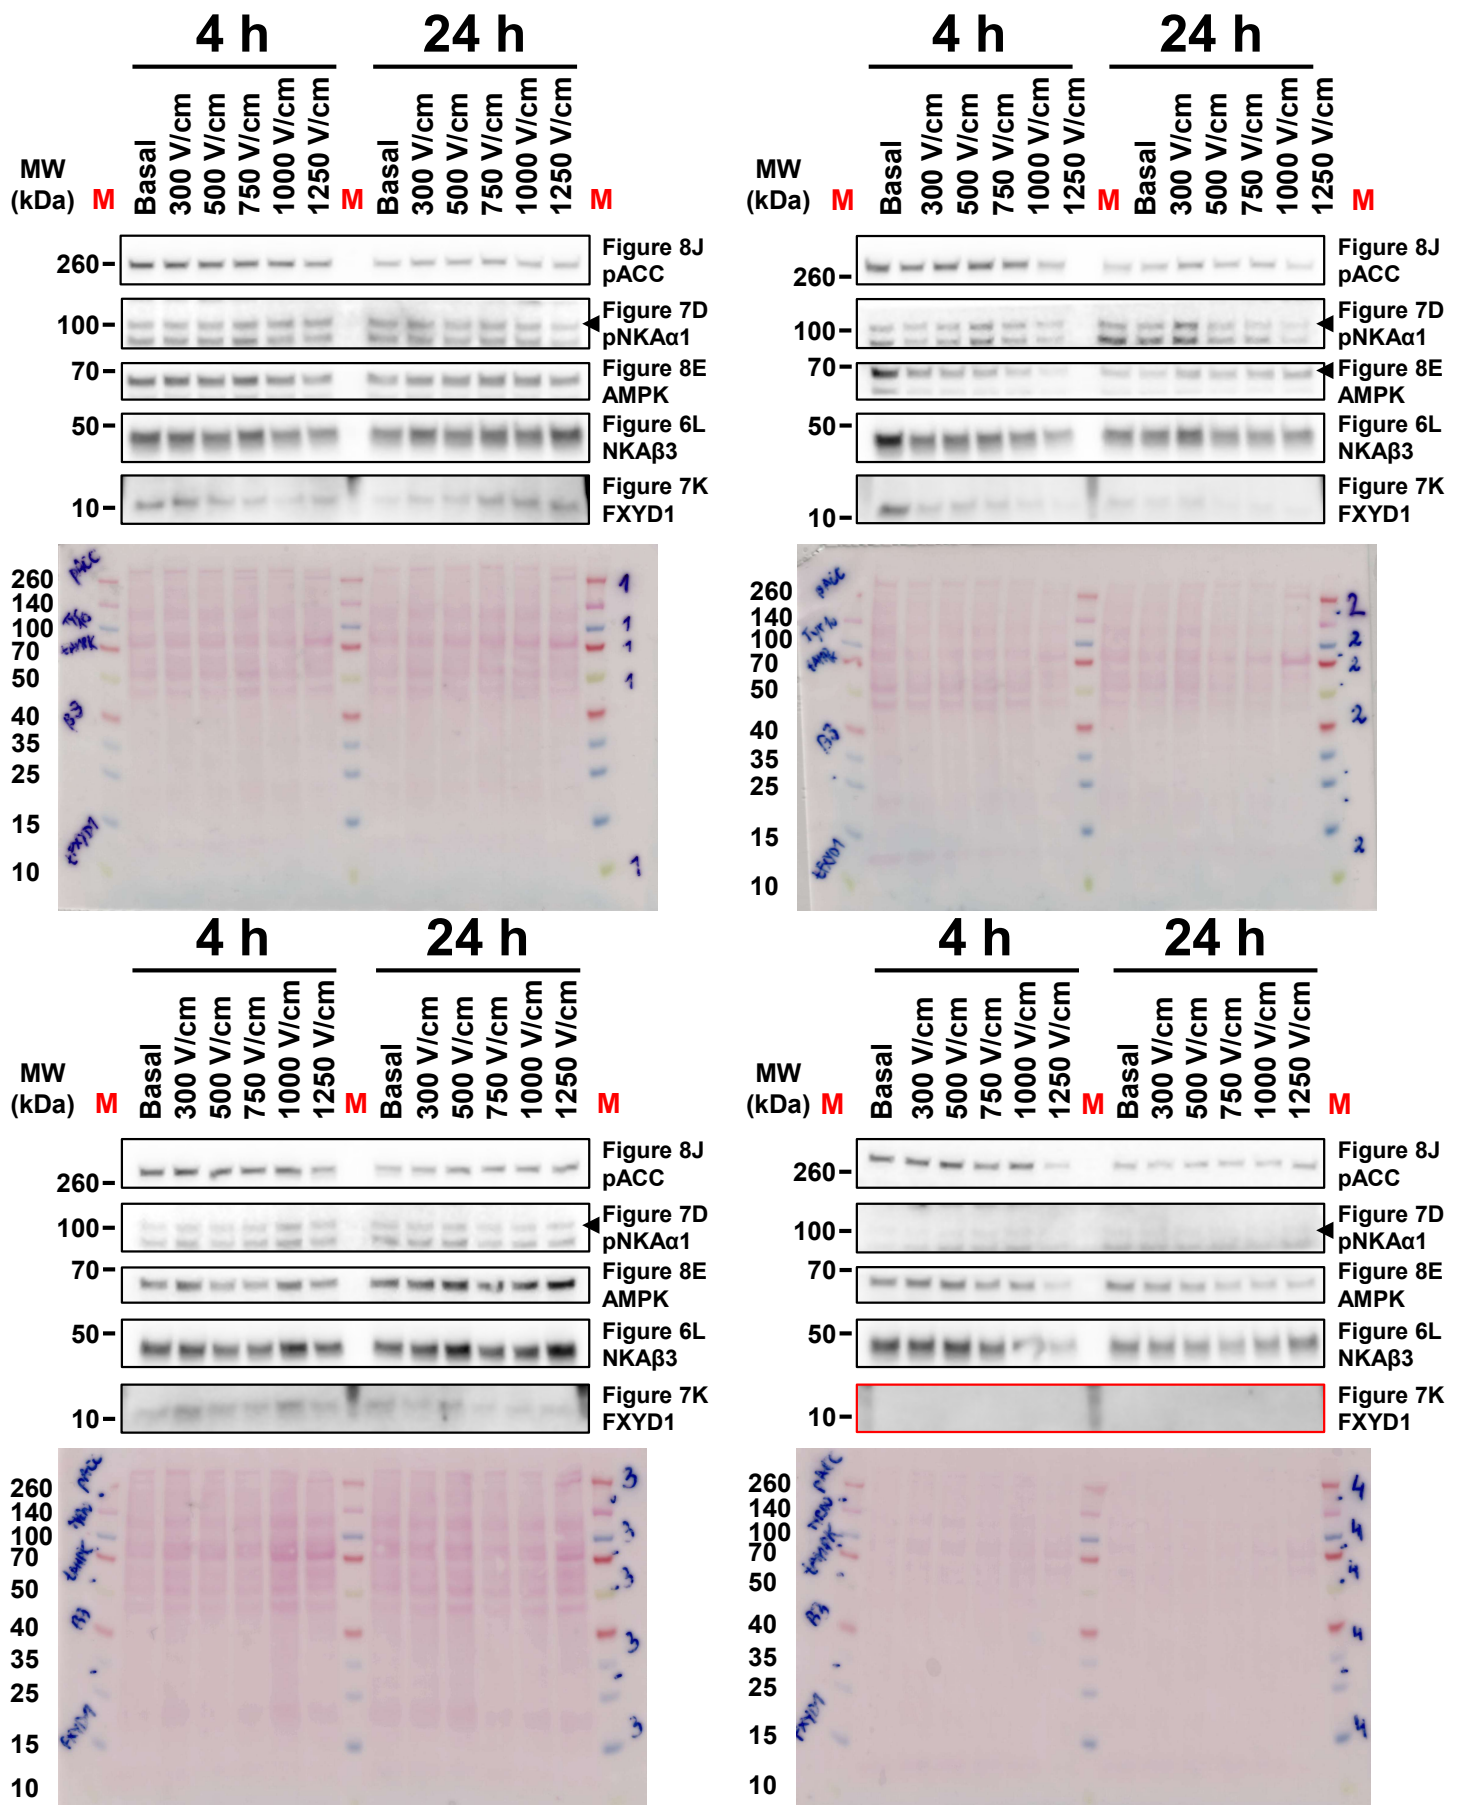

Red framed blots were excluded from statistical analyses either due to low intensity or no visible bands.

Detections that were performed on stripped membranes are labelled with asterisks and green text

Immunoreactive bands were visualized using enhanced chemiluminescence using Alliance Q9 (Uvitec, UK) and Quantity One 1-D Analysis Software 4.6.8. (Bio-Rad, U.S.)

Loading and transfer were evaluated by Ponceau S (0.1% (w/v) in 5% (v/v) acetic acid) staining.

## Bipolar pulses

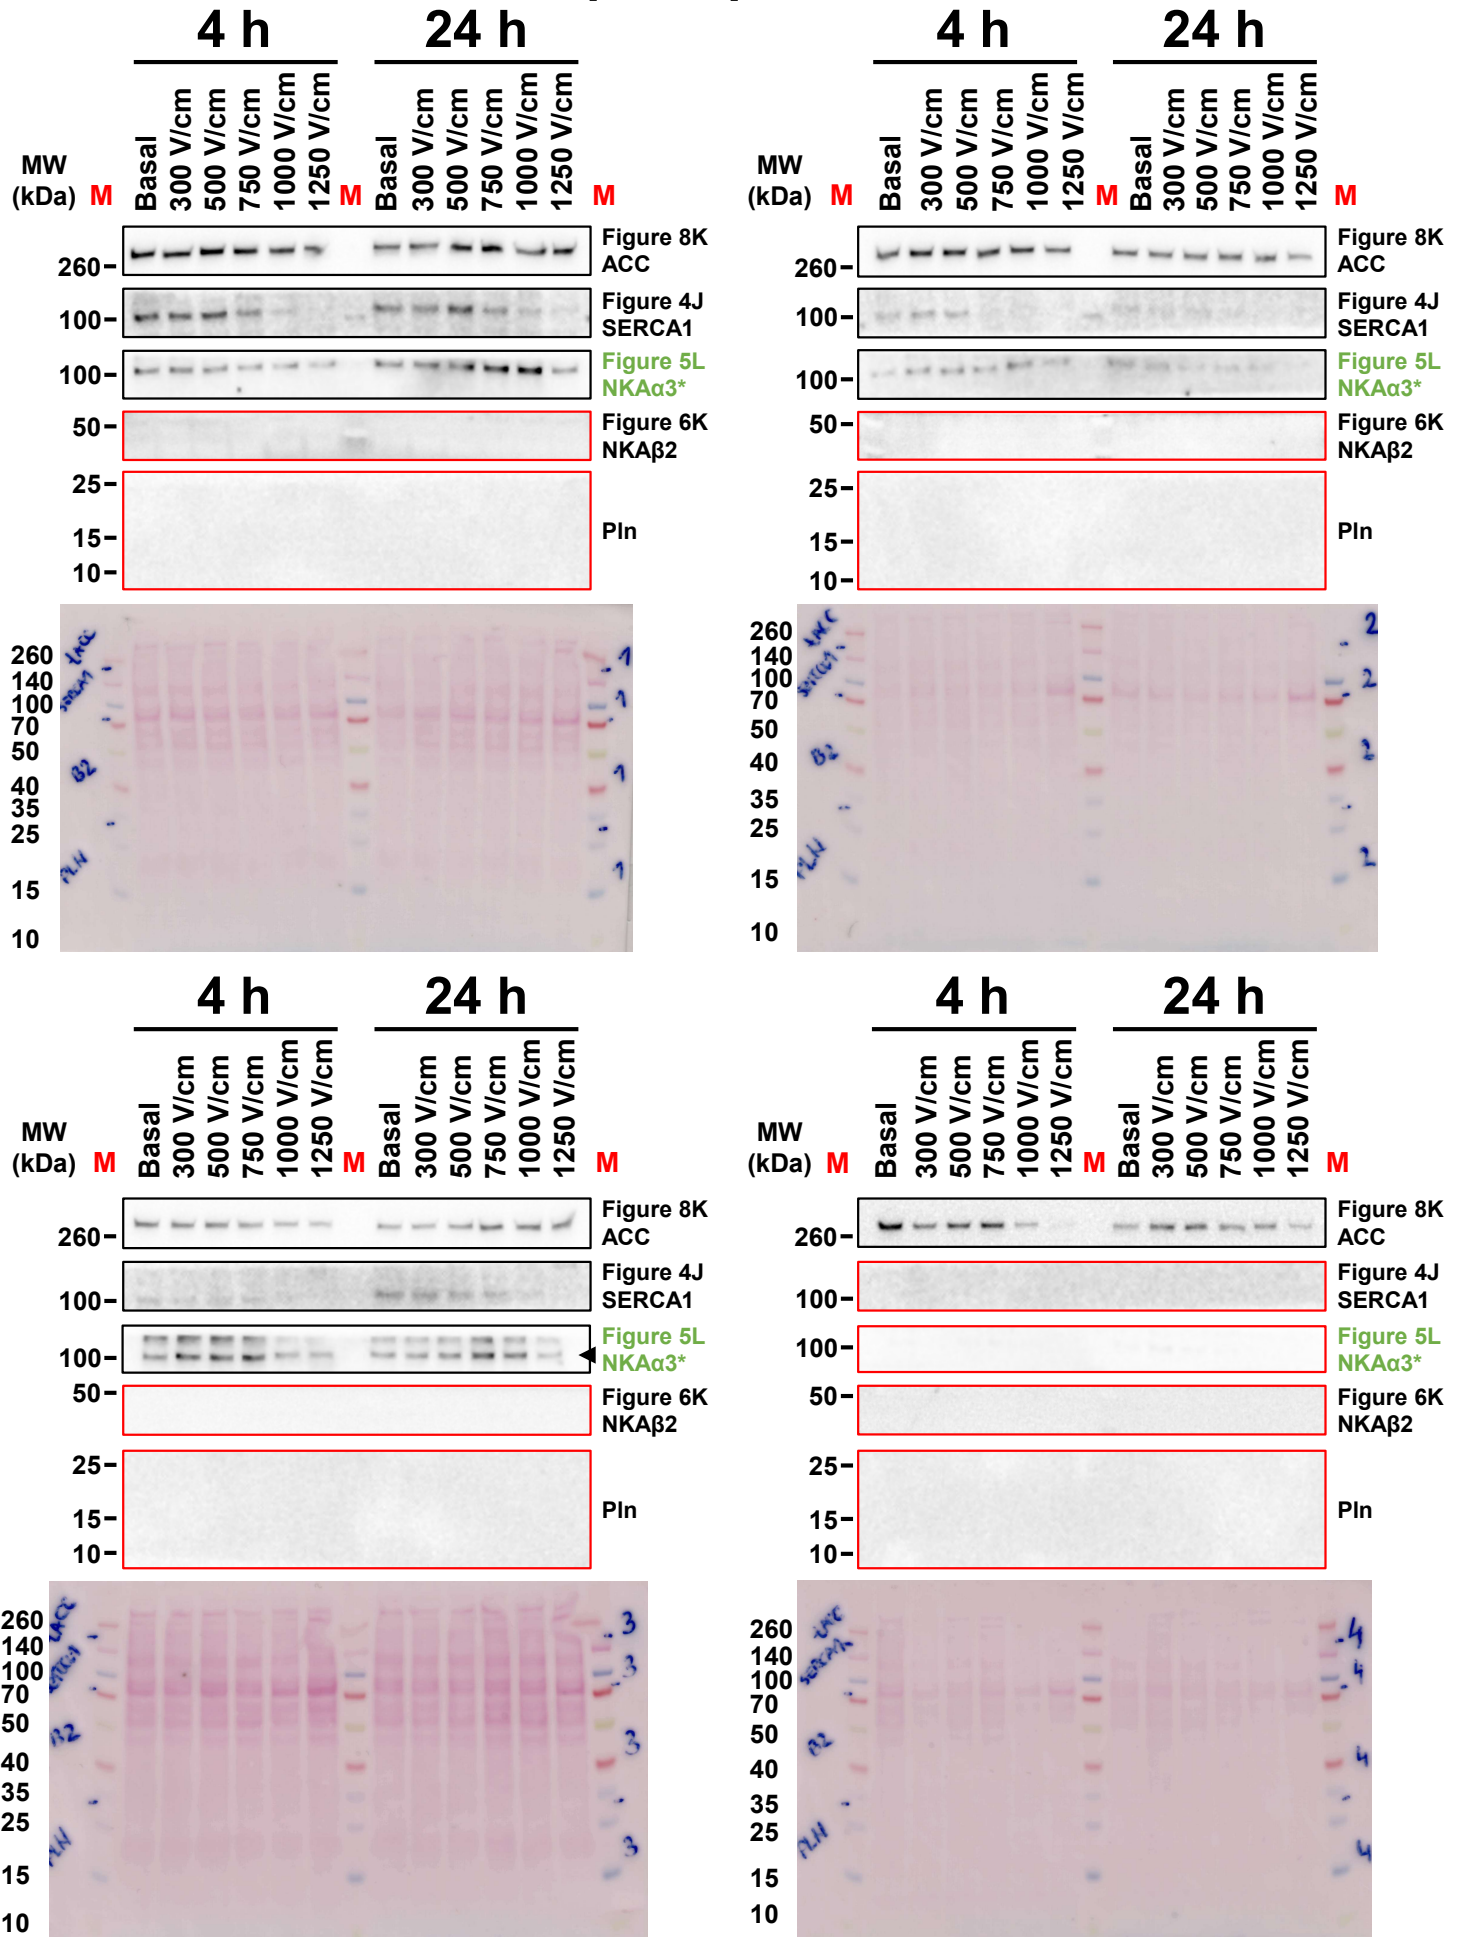

Red framed blots were excluded from statistical analyses either due to low intensity or no visible bands.

Detections that were performed on stripped membranes are labelled with asterisks and green text

Immunoreactive bands were visualized using enhanced chemiluminescence using Alliance Q9 (Uvitec, UK) and Quantity One 1-D Analysis Software 4.6.8. (Bio-Rad, U.S.)

Loading and transfer were evaluated by Ponceau S (0.1% (w/v) in 5% (v/v) acetic acid) staining.

## Bipolar pulses

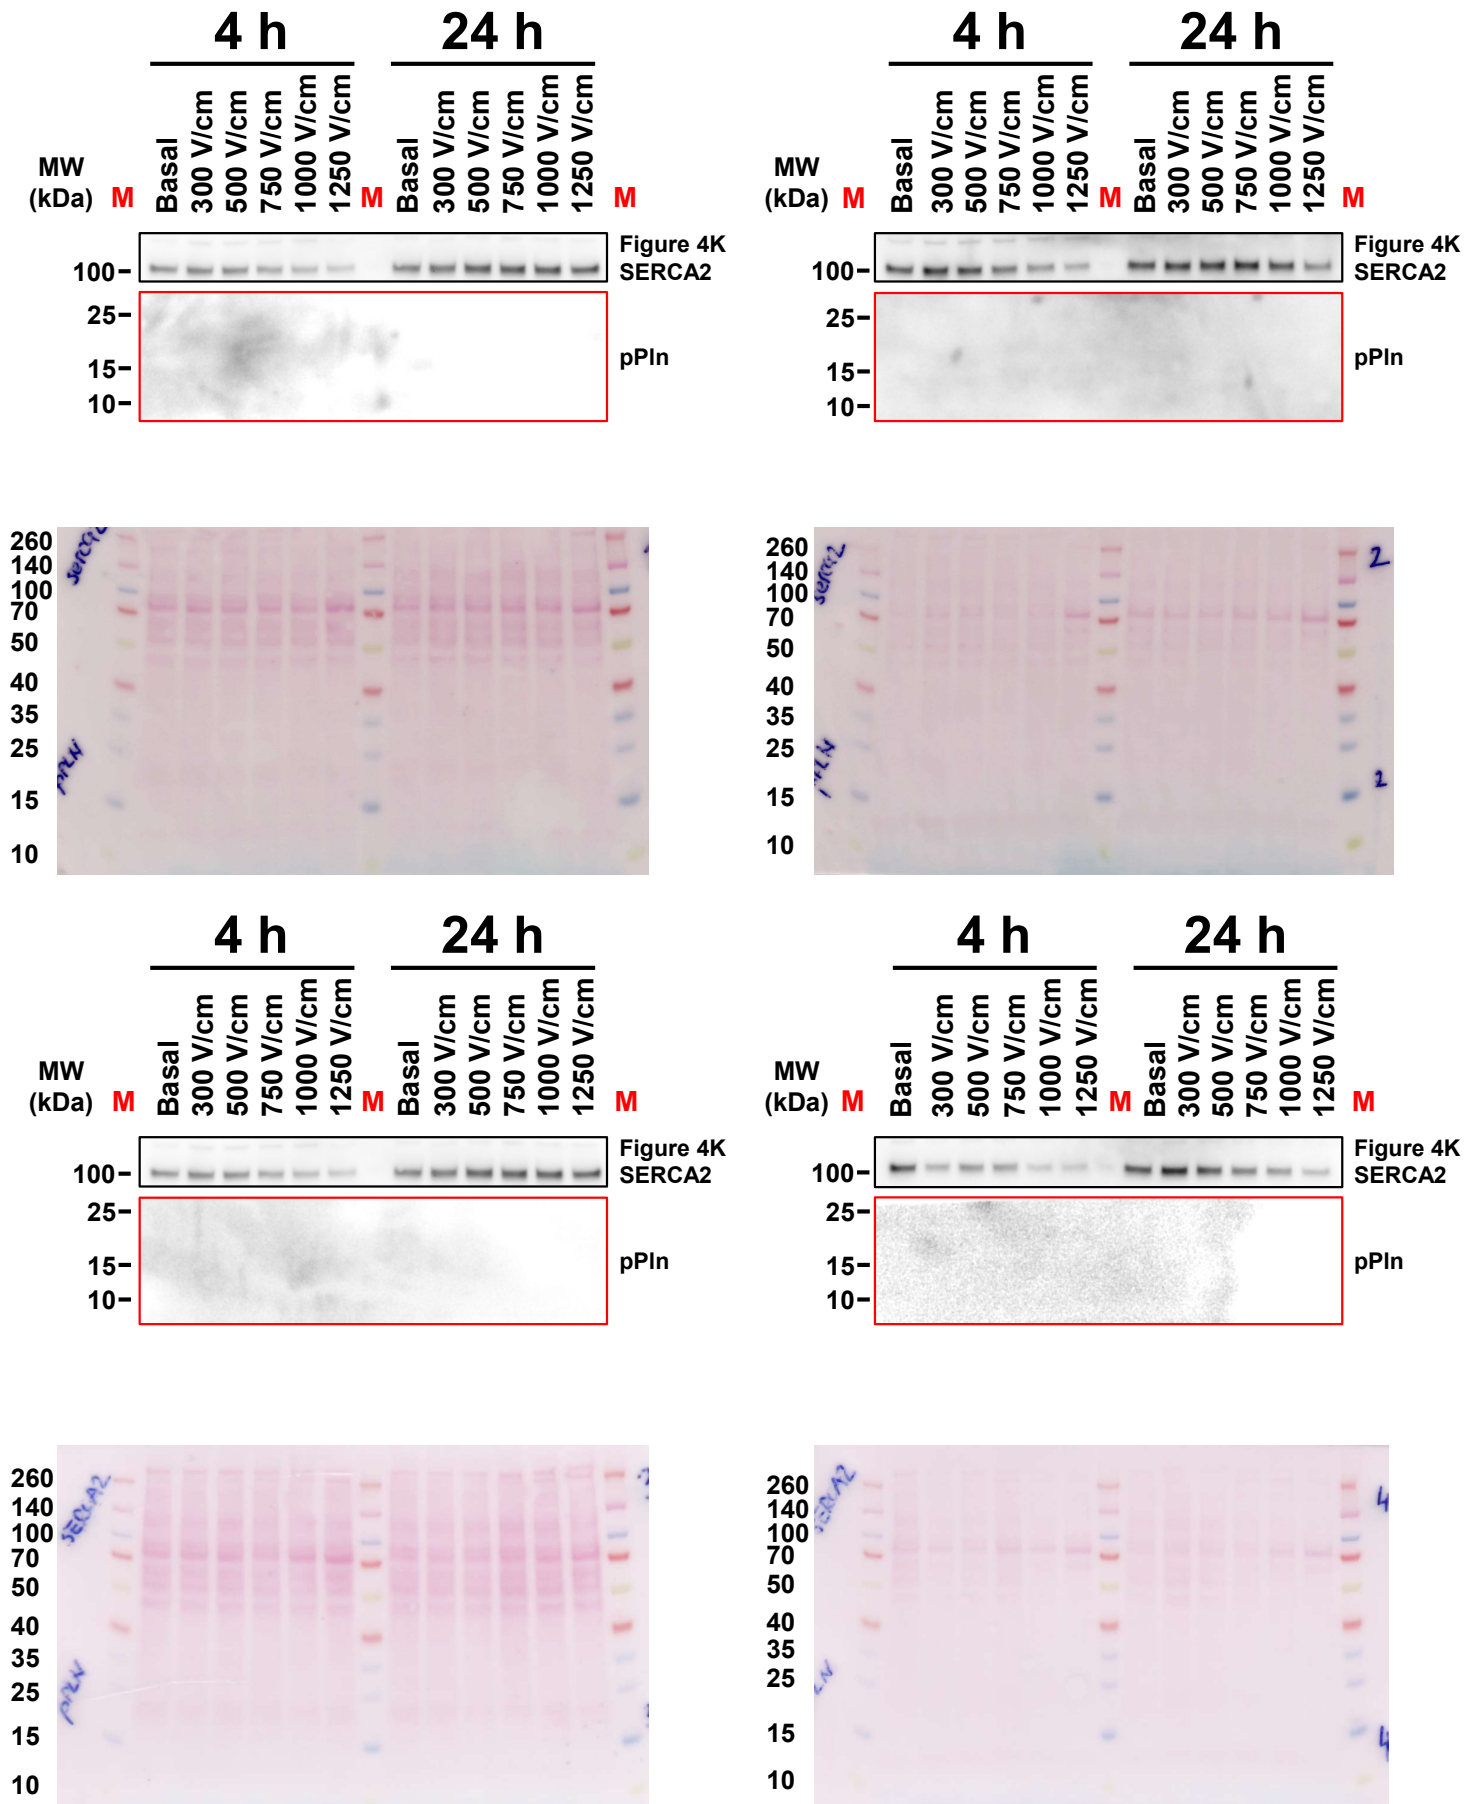

Red framed blots were excluded from statistical analyses either due to low intensity or no visible bands. Detections that were performed on stripped membranes are labelled with asterisks and green text
